# Supplementary material for: Selective C–H dithiocarbamation of arenes and antifungal activity evaluation
Source: Royal Society of Chemistry journal article supplement (doi:10.1039/c9ob02514f), 2020-01-01

## Selective C-H Dithiocarbamation of Drug Skeletons and Their Antifungal Activity

Zhuo-Bin Huang<sup>a</sup>, Xiong-Jian Xia<sup>b</sup>, Zi-Hao Huang<sup>a</sup>, Li Xu<sup>a</sup>, Xiao-Yong Zhang<sup>\*b</sup>, Ri-Yuan Tang<sup>\*ac</sup>

<sup>a</sup> Department of Applied Chemistry, College of Materials and Energy, South China Agricultural University, Guangzhou 510642, China

<sup>b</sup> Joint Laboratory of Guangdong Province and Hong Kong Region on Marine Bioresource Conservation and Exploitation, College of Marine Science, South China Agricultural University, Guangzhou 510642, China

<sup>c</sup> Lingnan Guangdong Laboratory of Modern Agriculture, Guangzhou, 510642, China.

E-mail: [rytang@scau.edu.cn](mailto:rytang@scau.edu.cn), [zhangxiaoyong@scau.edu.cn](mailto:zhangxiaoyong@scau.edu.cn)

### NMR Spectra for products

### 5-amino-1-methyl-1H-pyrazol-4-yl dimethylcarbamodithioate (3)

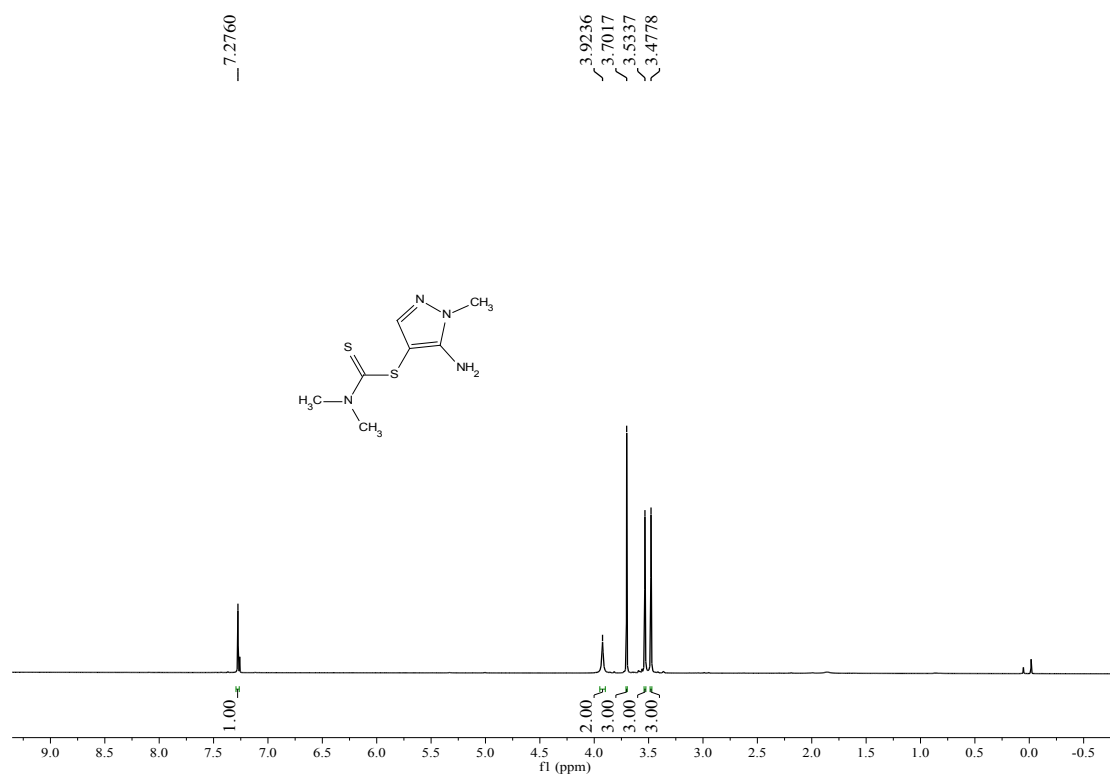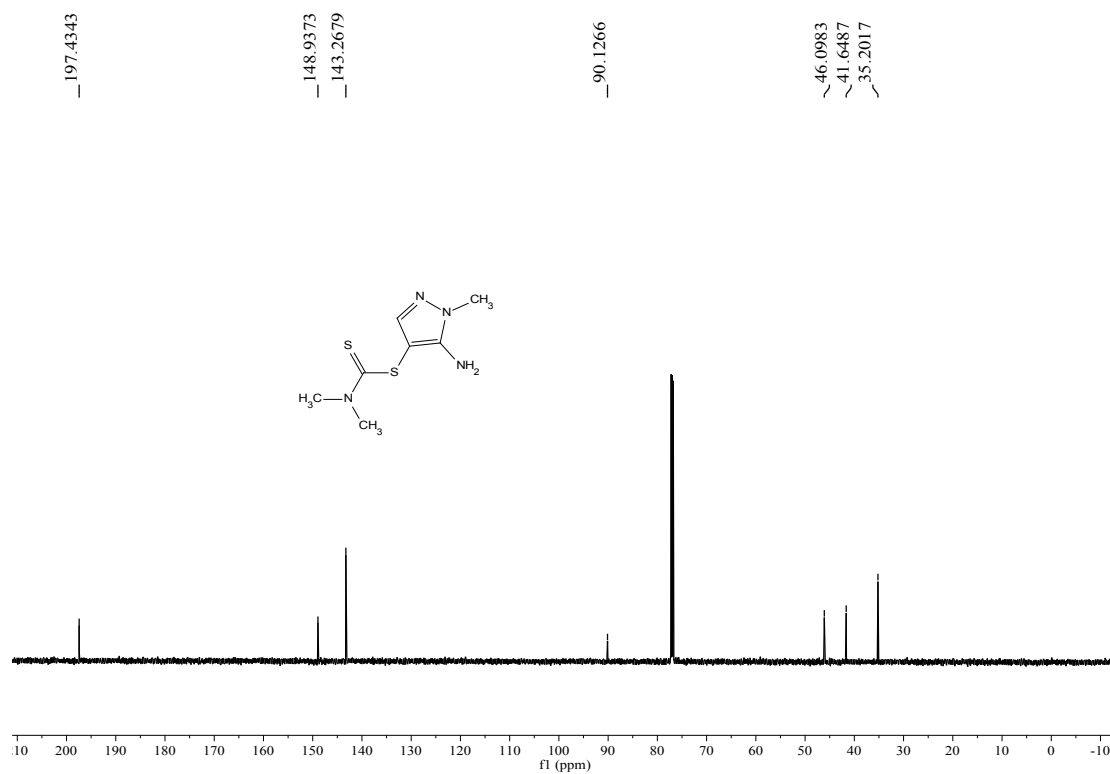

### 5-amino-1,3-dimethyl-1H-pyrazol-4-yl dimethylcarbamodithioate(4)

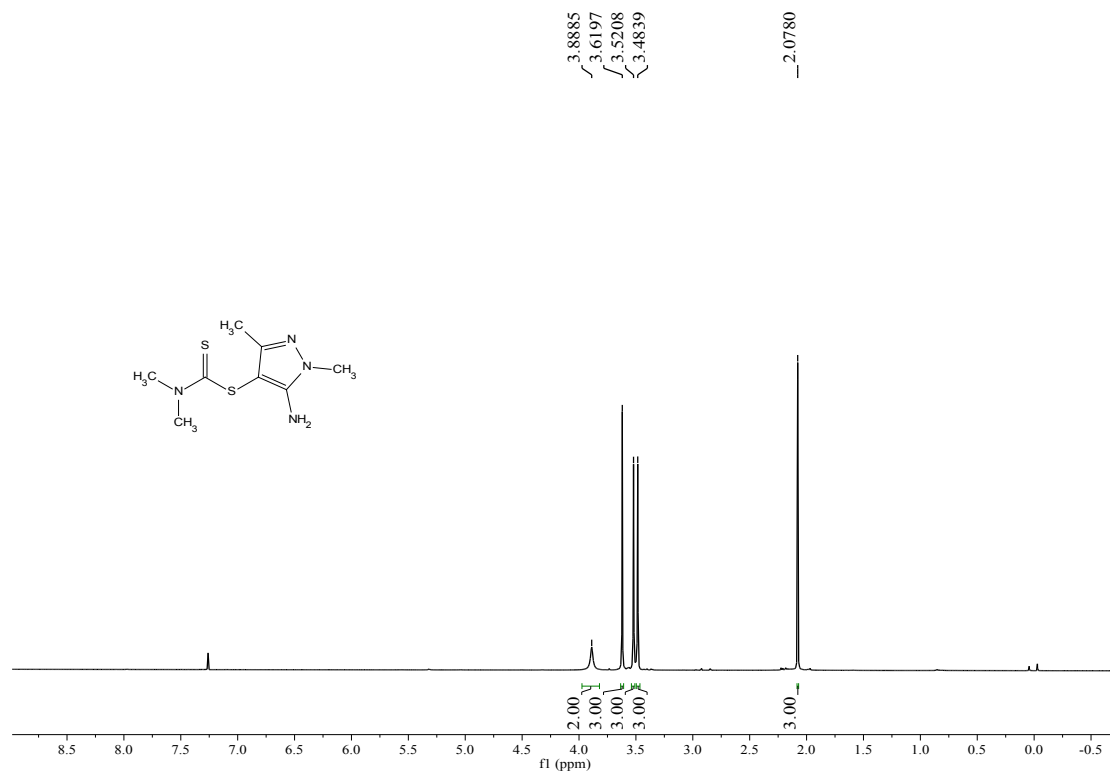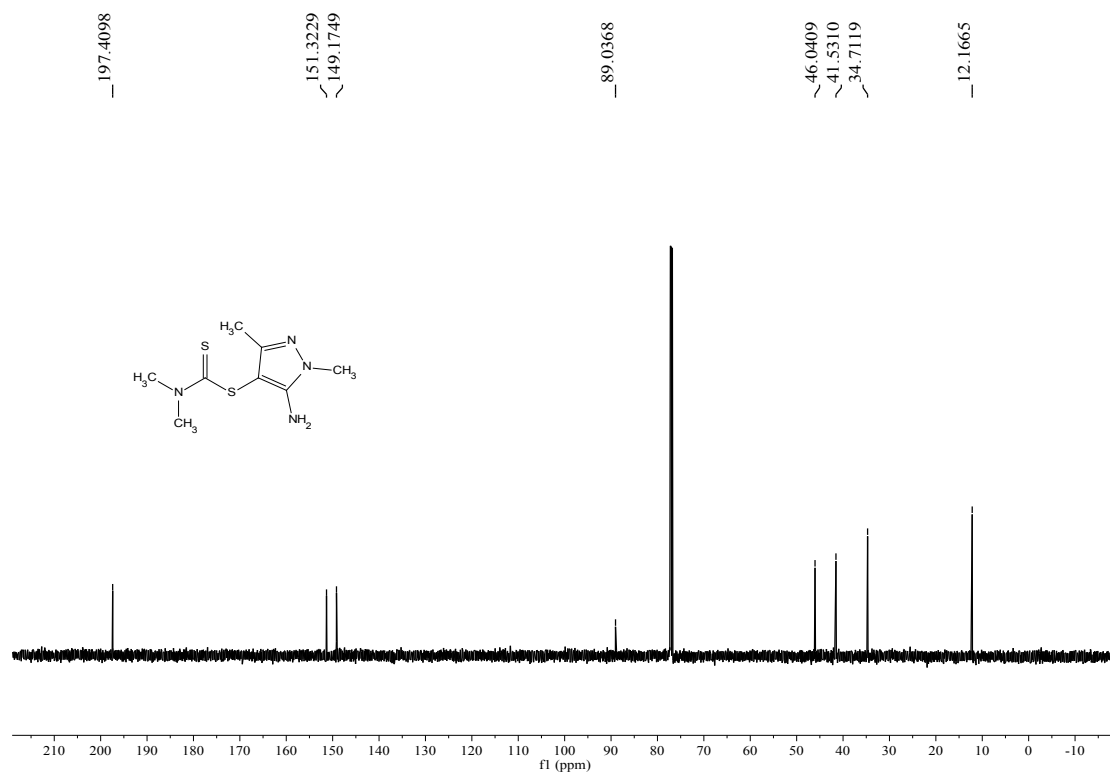

### 5-amino-1-phenyl-1H-pyrazol-4-yl dimethylcarbamodithioate(5)

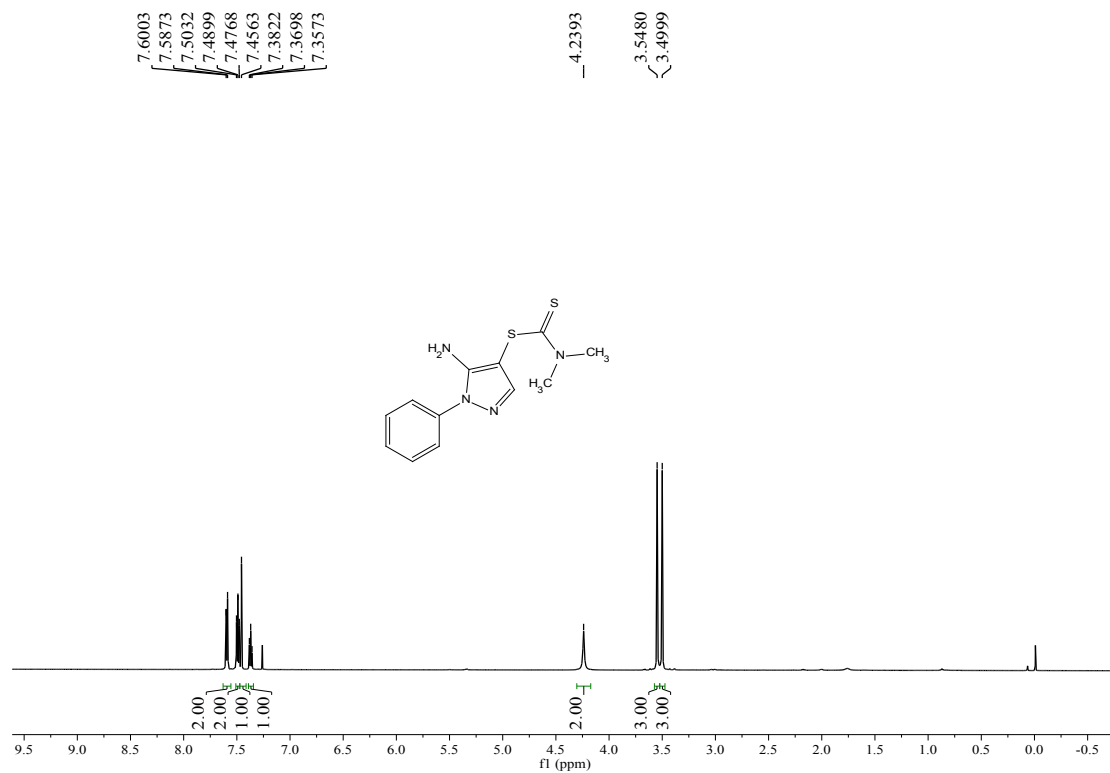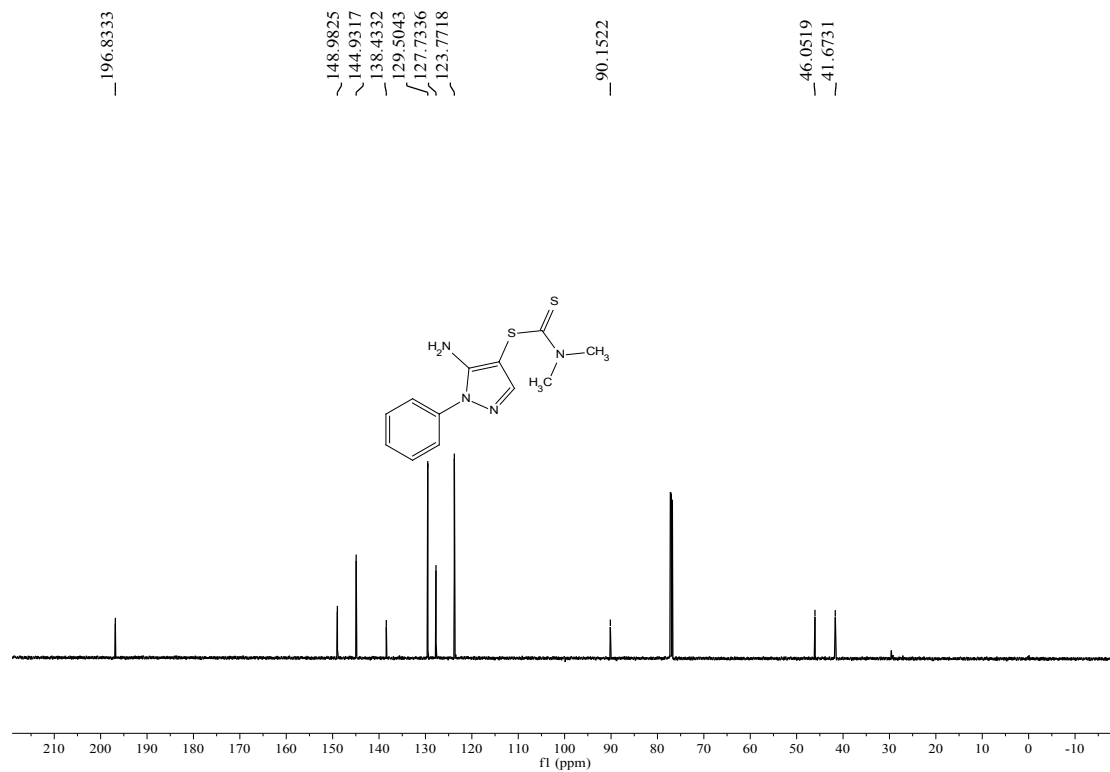

**5-amino-3-methyl-1-phenyl-1H-pyrazol-4-yl dimethylcarbamodithioate(6)**

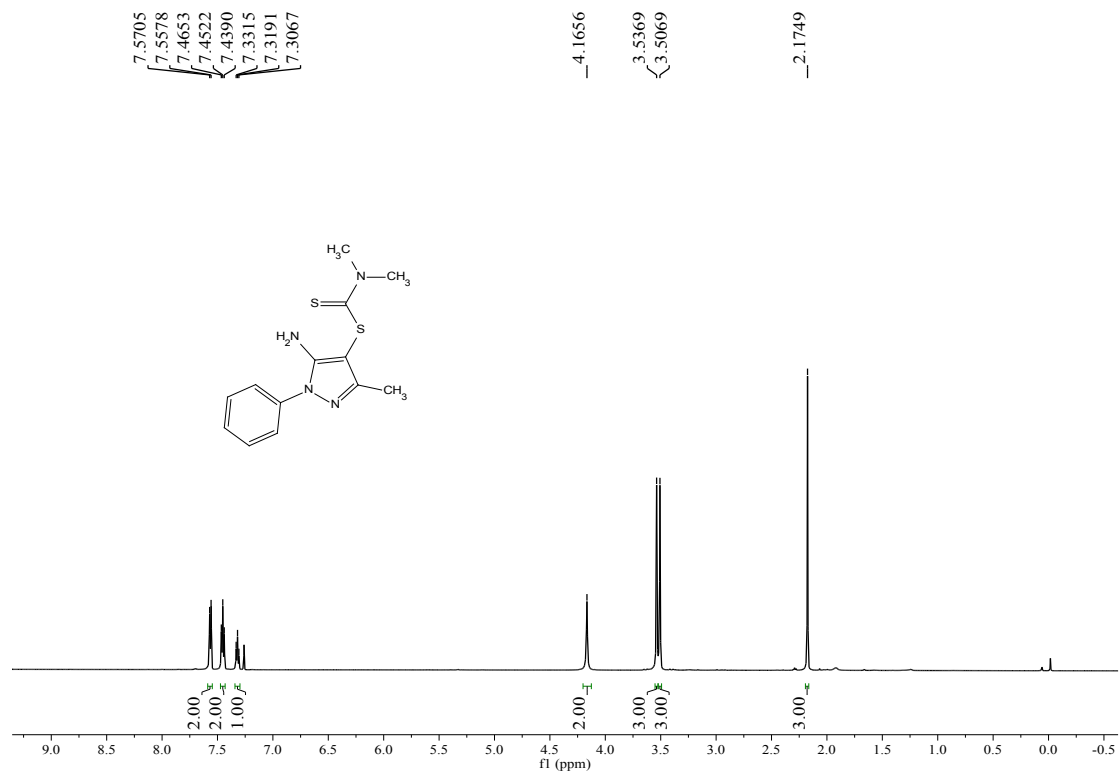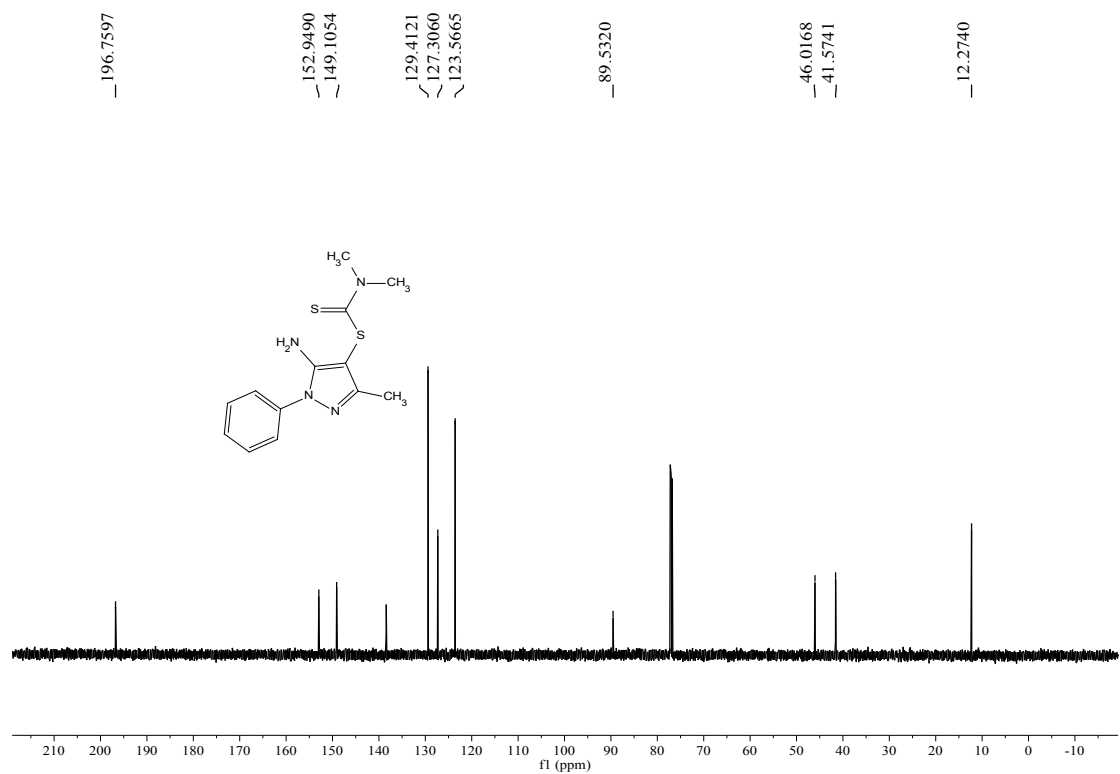

5-amino-3-tert-butyl-1-p-tolyl-1H-pyrazol-4-yl dimethylcarbamodithioate(7)

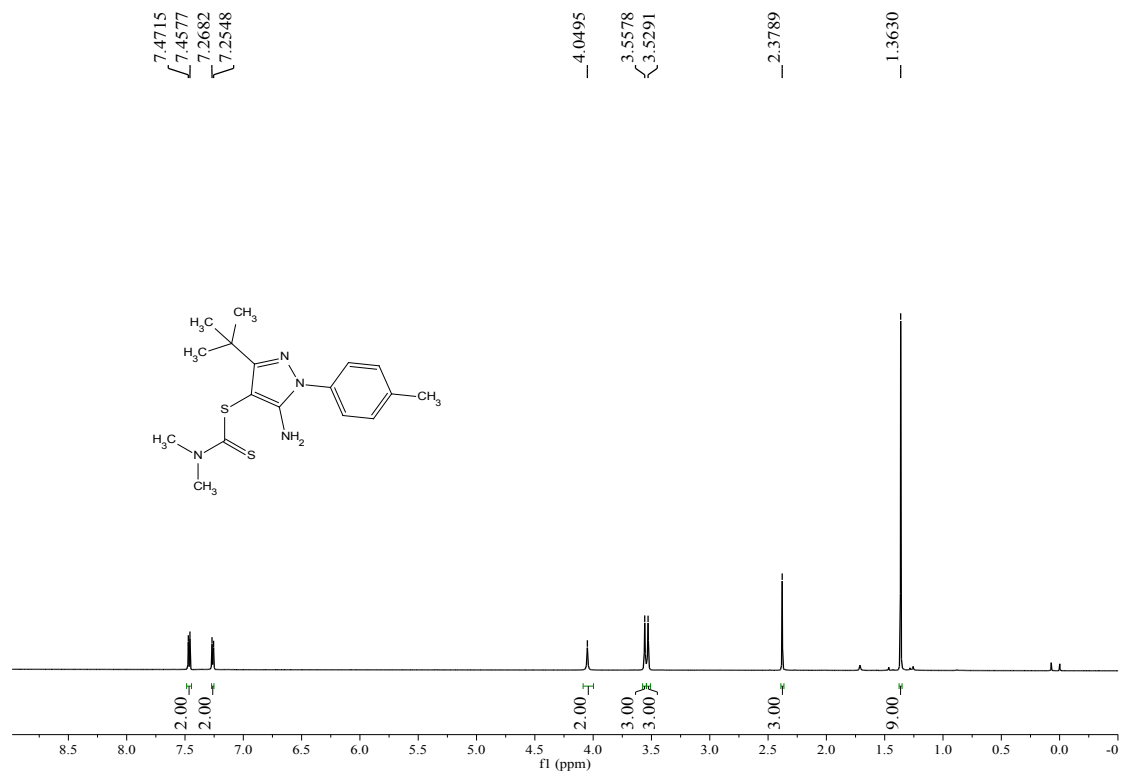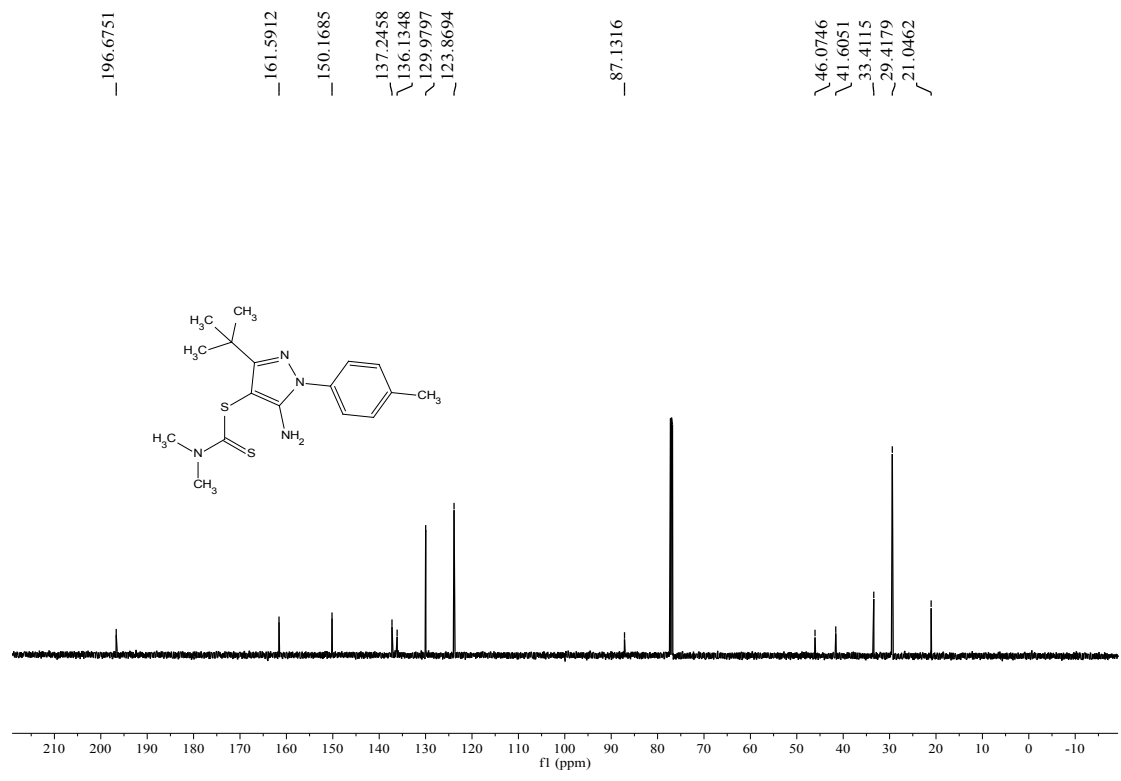

5-amino-1,3-diphenyl-1H-pyrazol-4-yl dimethylcarbamodithioate(8)

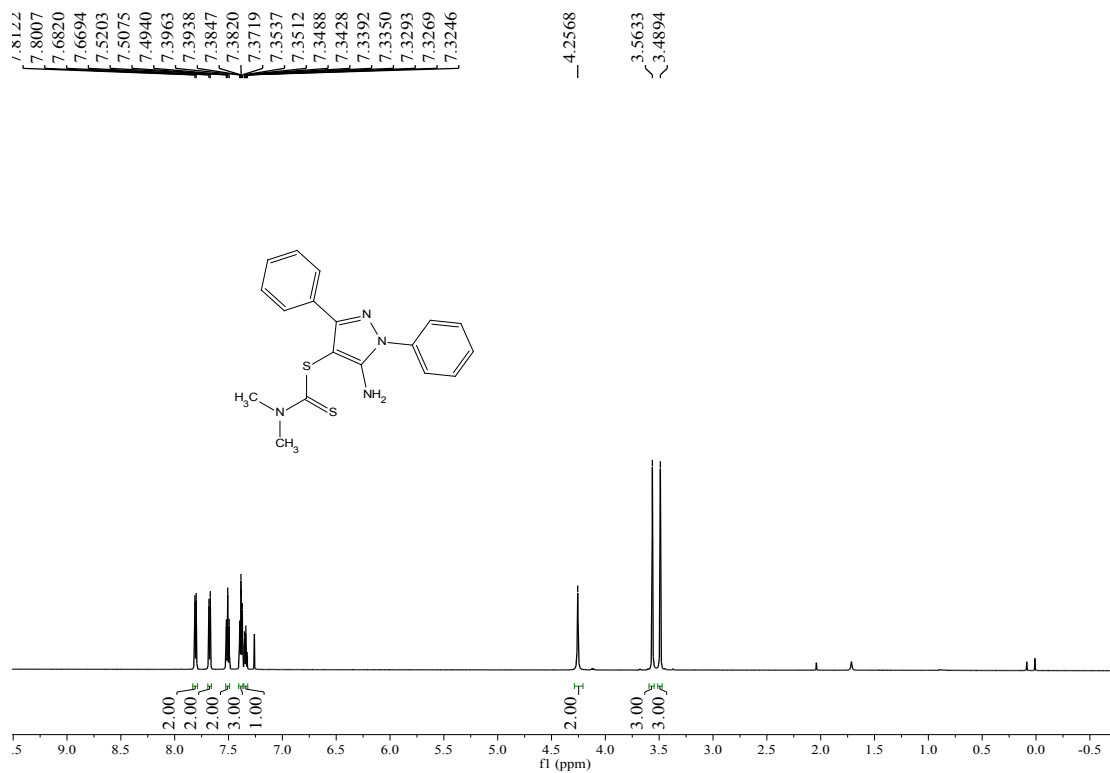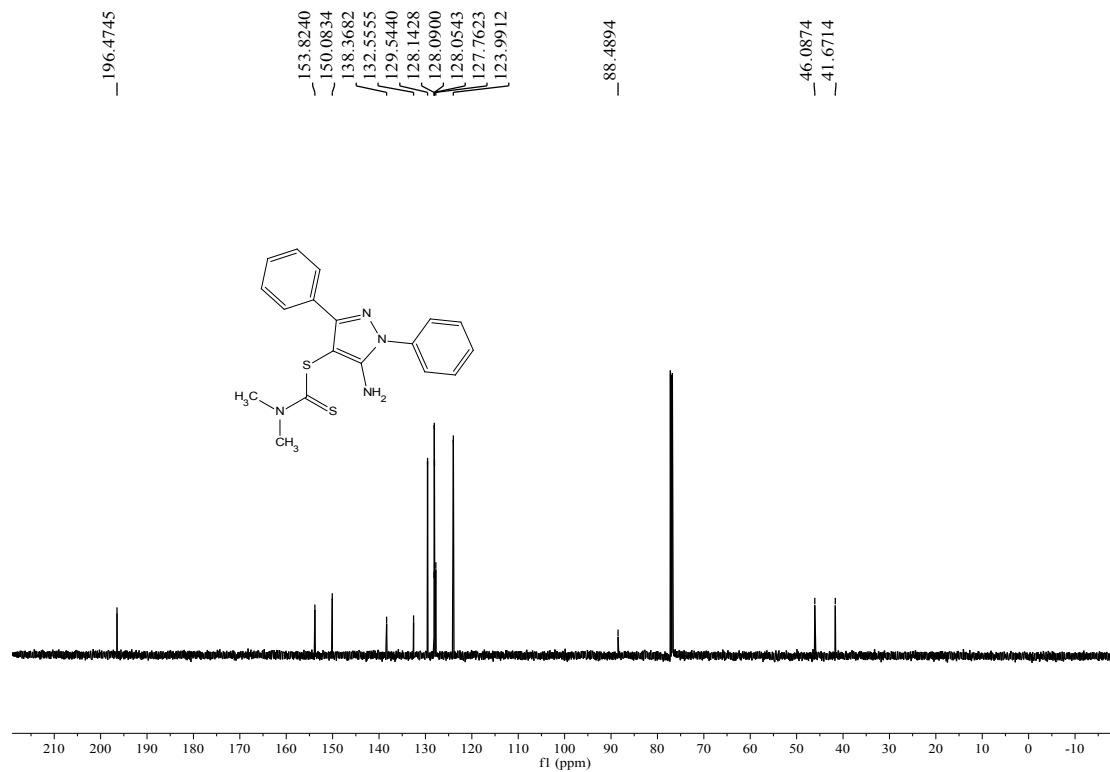

5-amino-1-methyl-3-phenyl-1H-pyrazol-4-yl dimethylcarbamodithioate(9)

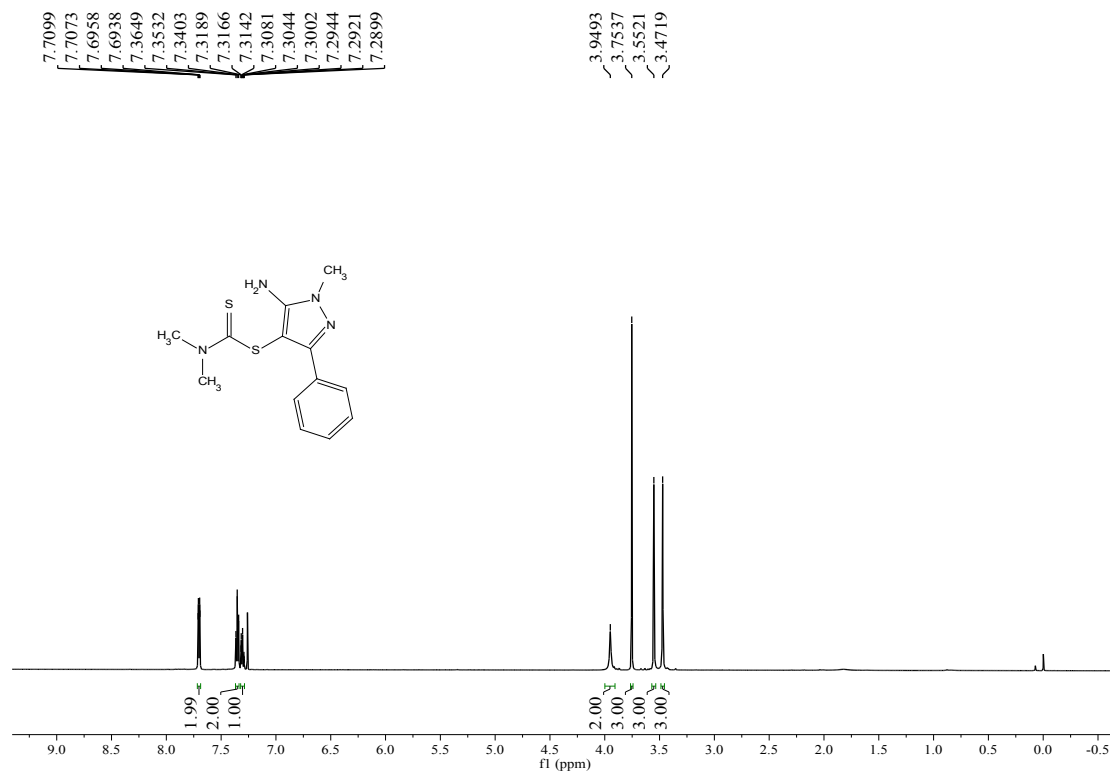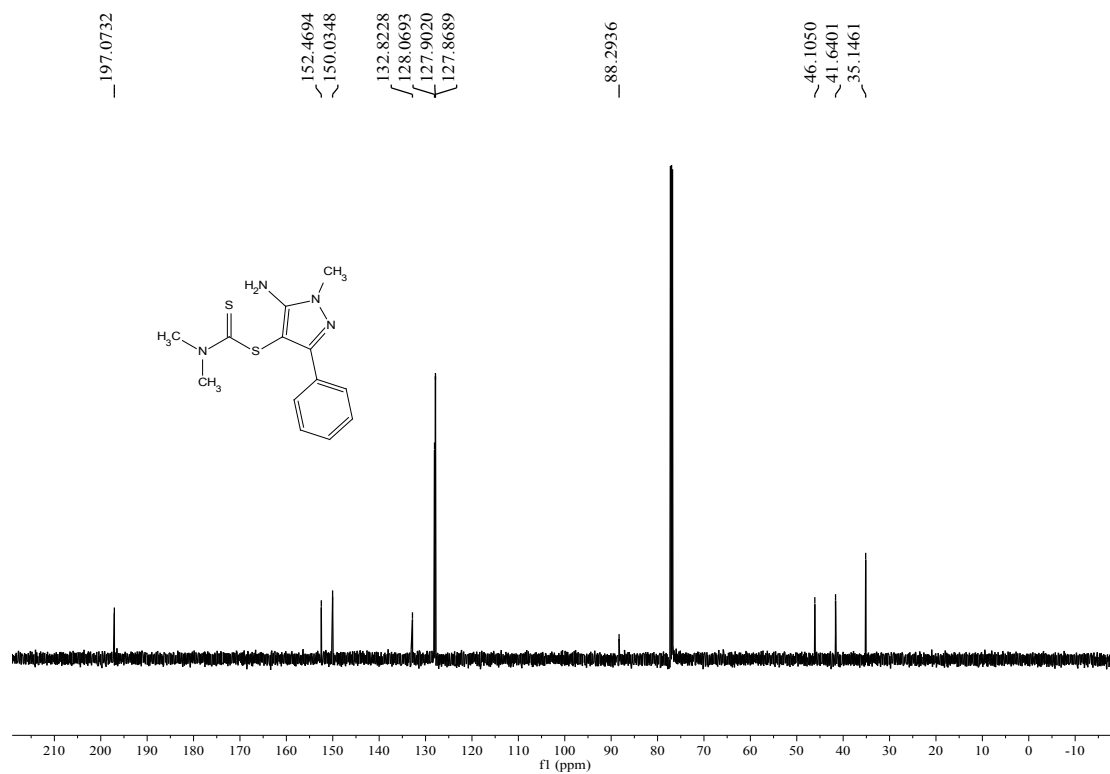



**5-amino-3-methyl-1-phenyl-1H-pyrazol-4-yl diethylcarbamodithioate(10)**

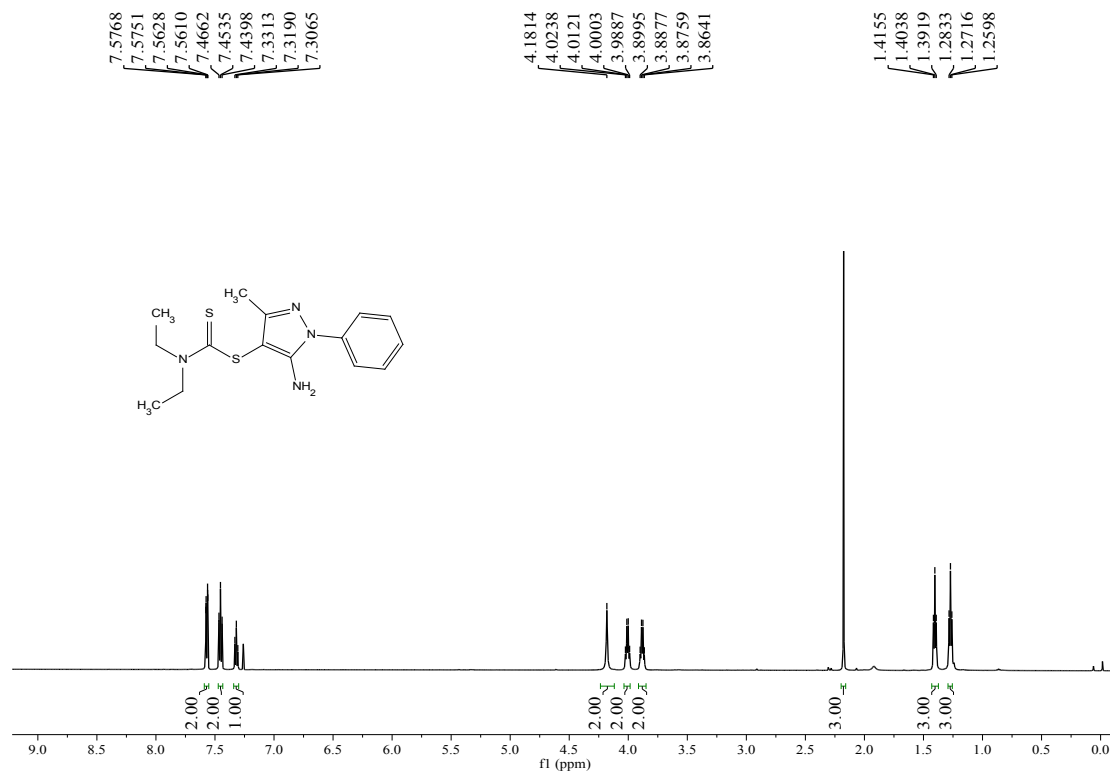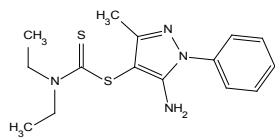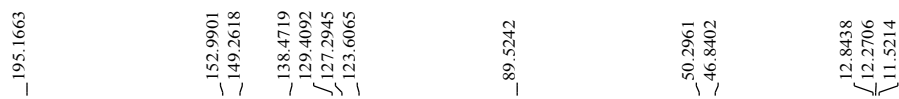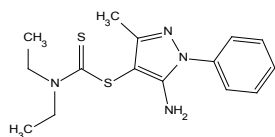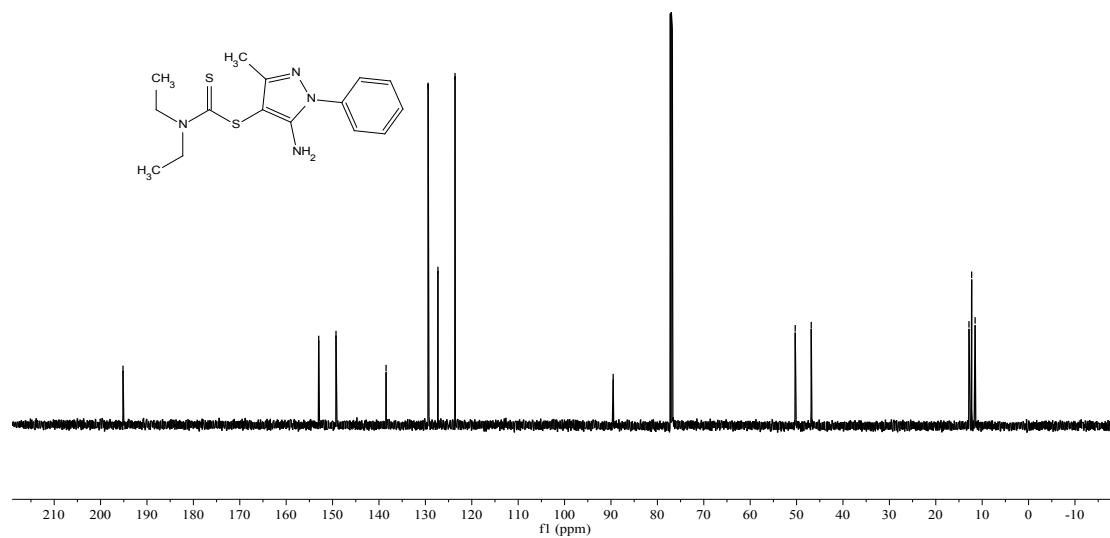

5-amino-1-methyl-3-phenyl-1H-pyrazol-4-yl diethylcarbamodithioate(11)

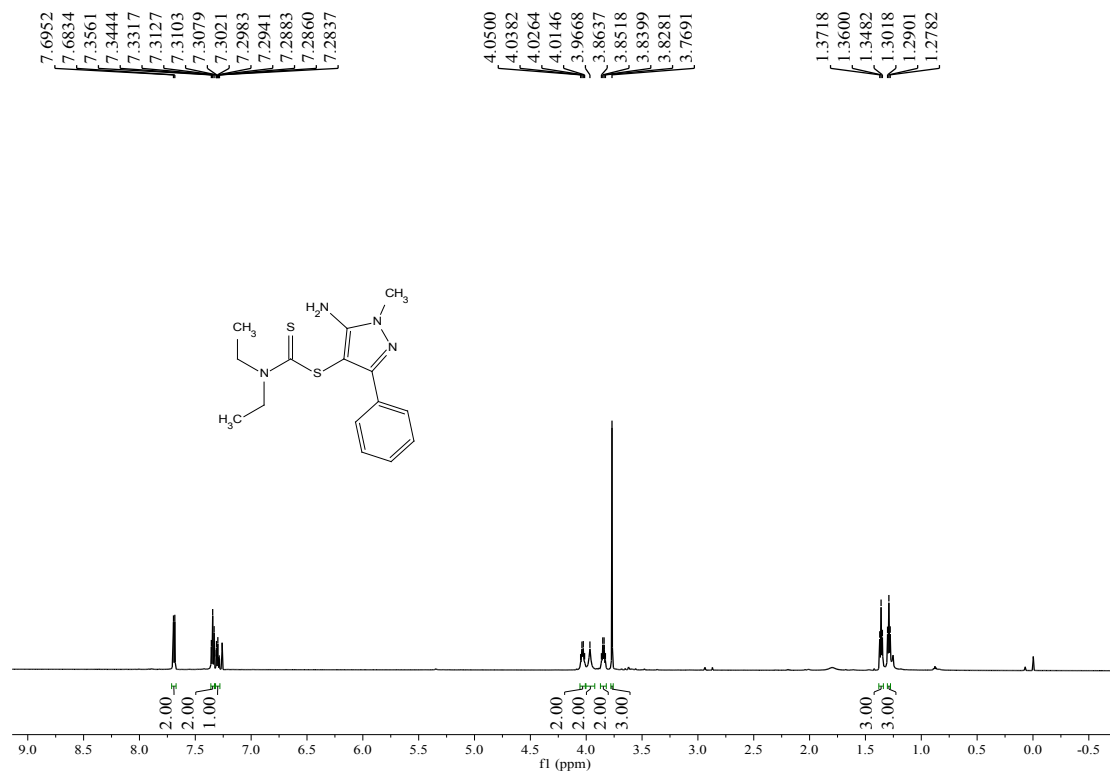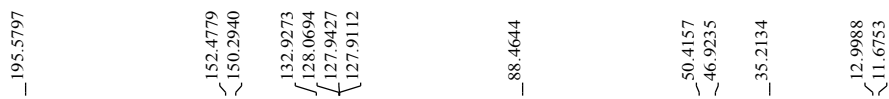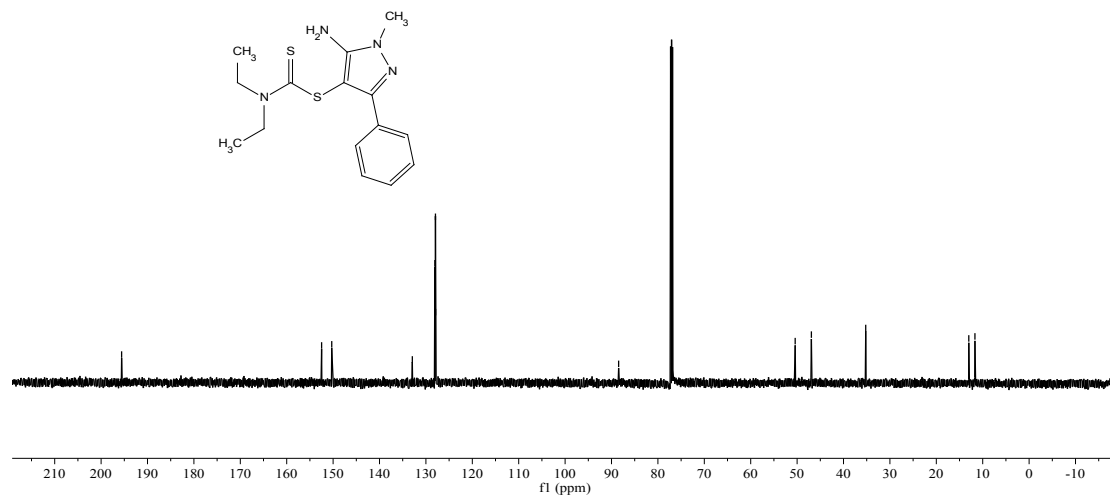

5-amino-1-methyl-3-phenyl-1H-pyrazol-4-yl diisopropylcarbamo(dithio)ate(12)

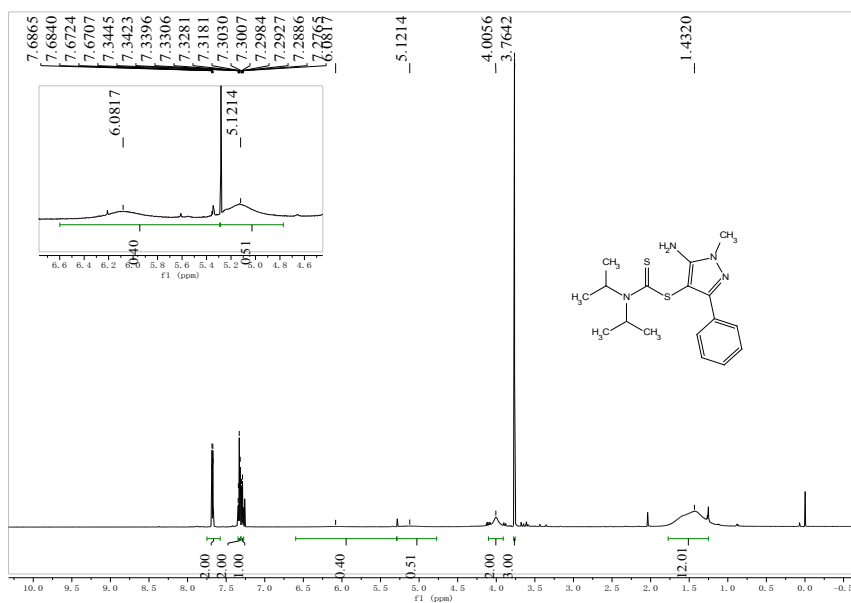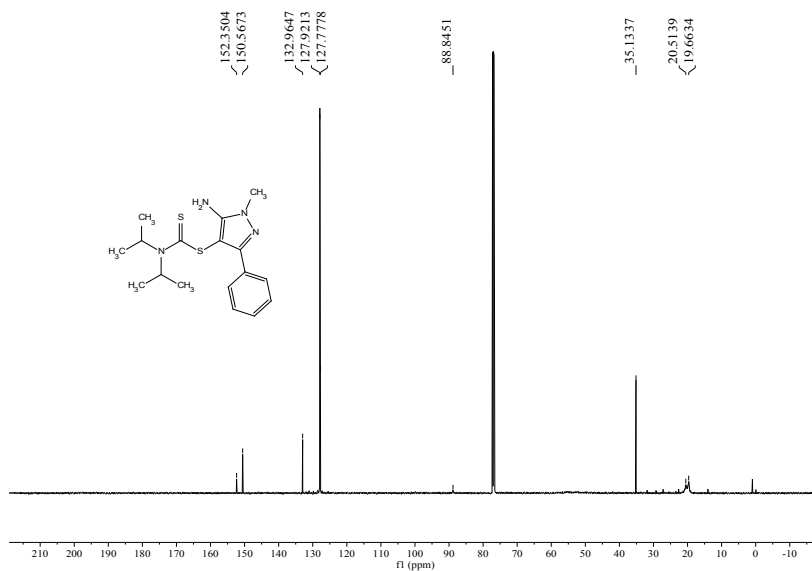

222 #17 RT: 0.23 AV: 1 NL: 2.86E8  
T: FTMS + p ESI Full ms [100.00-1000.00]

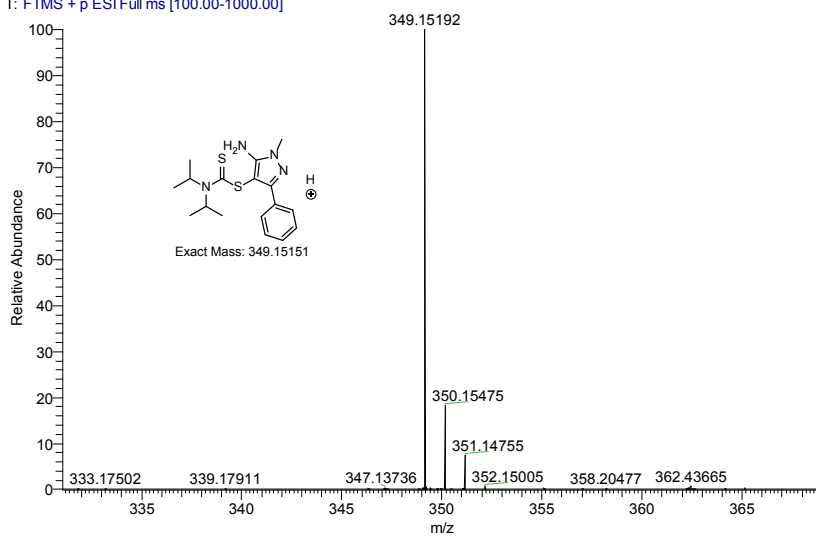

# 1H-indol-3-yl dimethylcarbamodithioate(13)

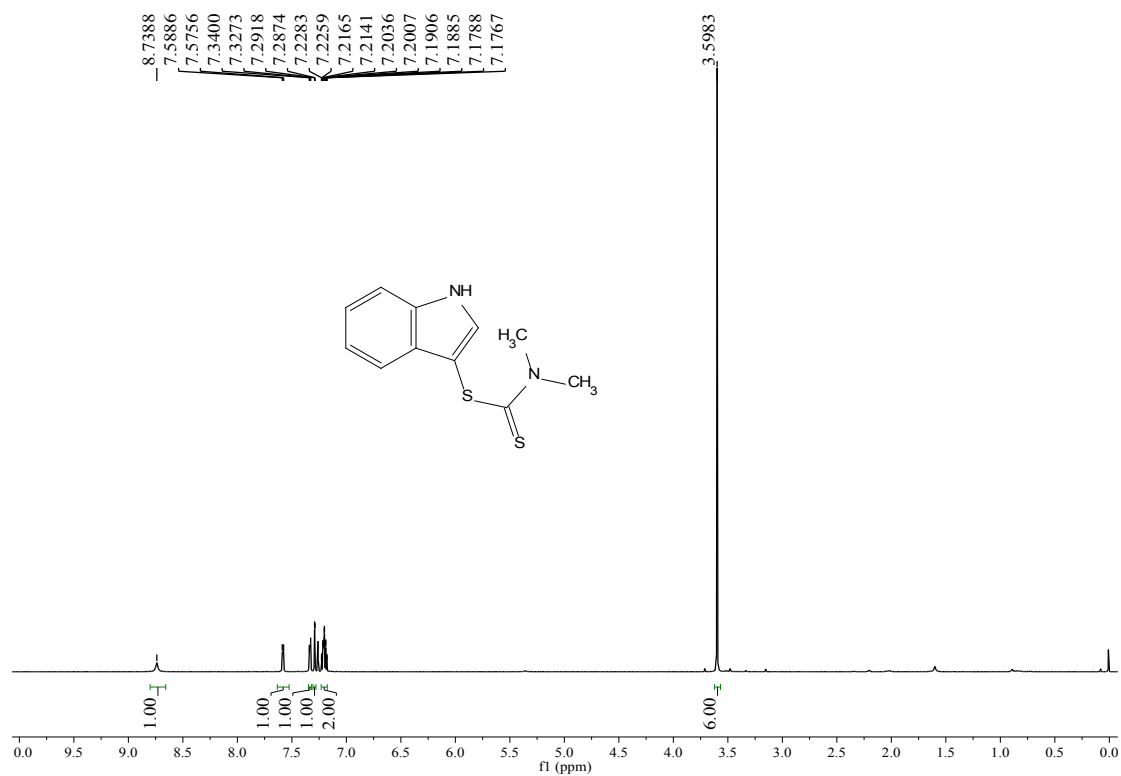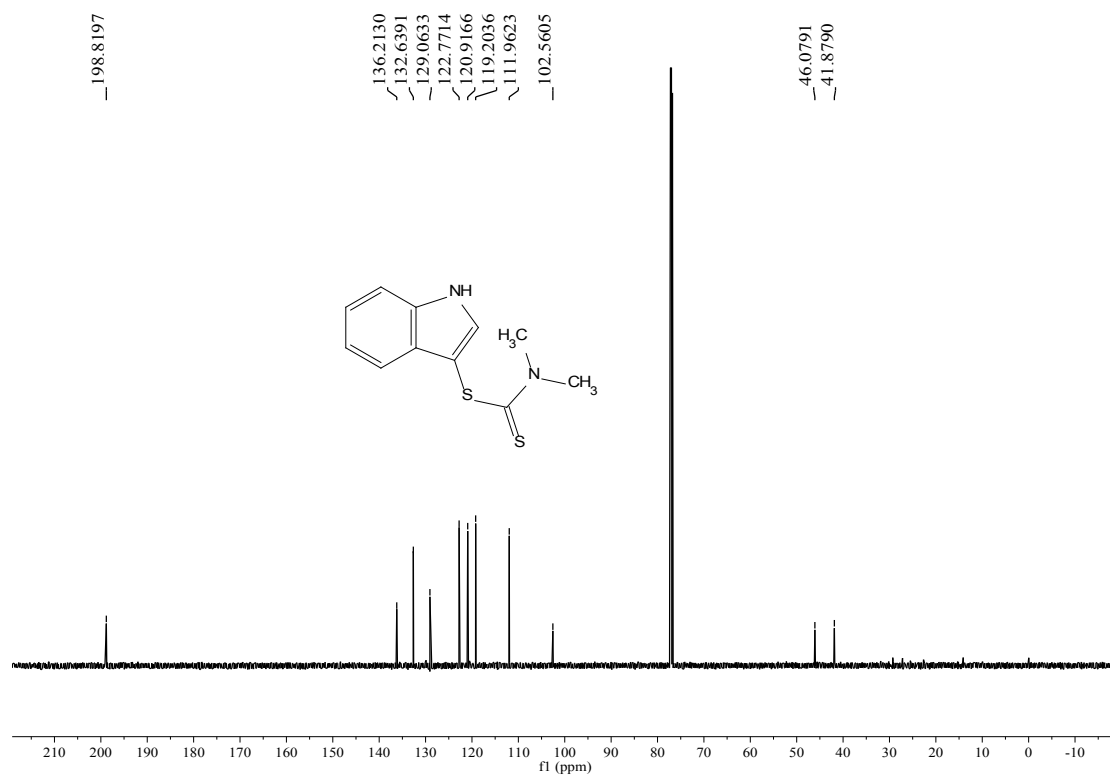

### 2-methyl-1H-indol-3-yl dimethylcarbamodithioate(14)

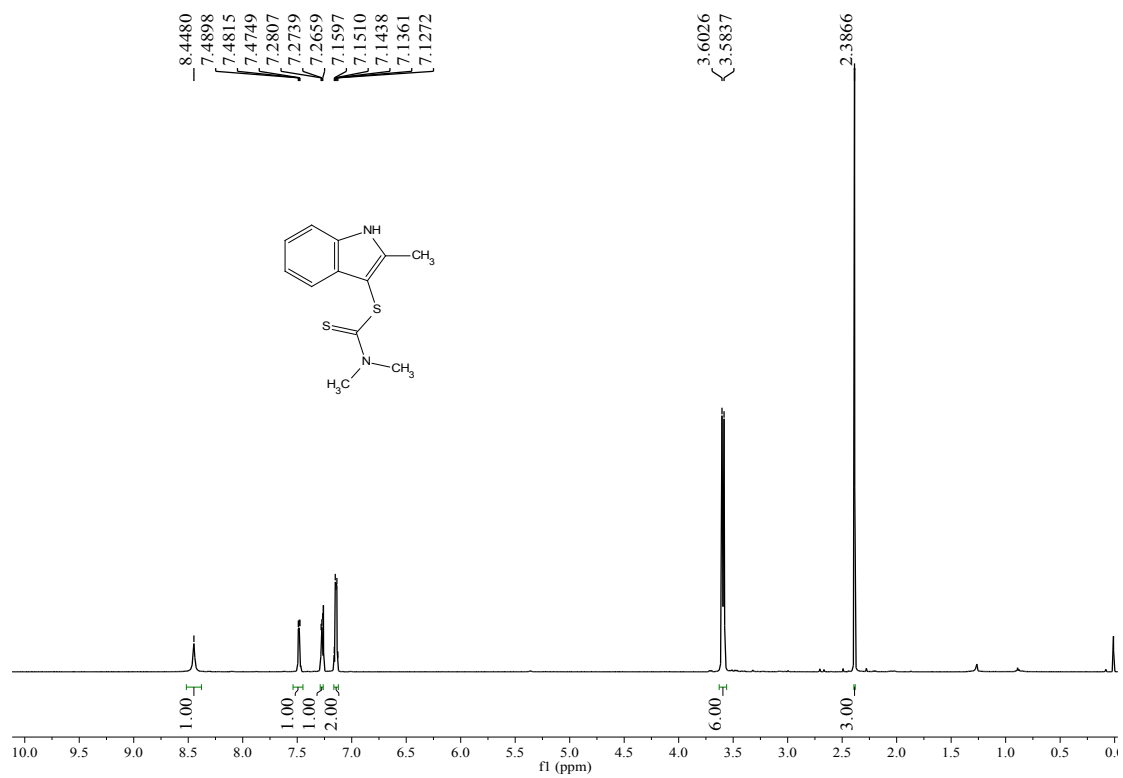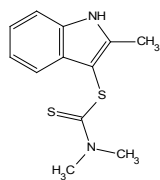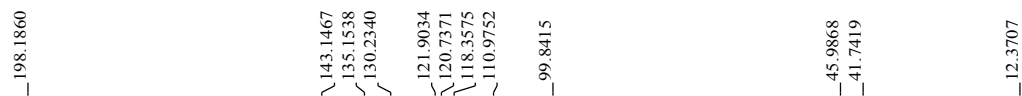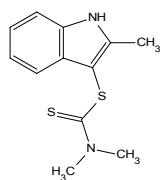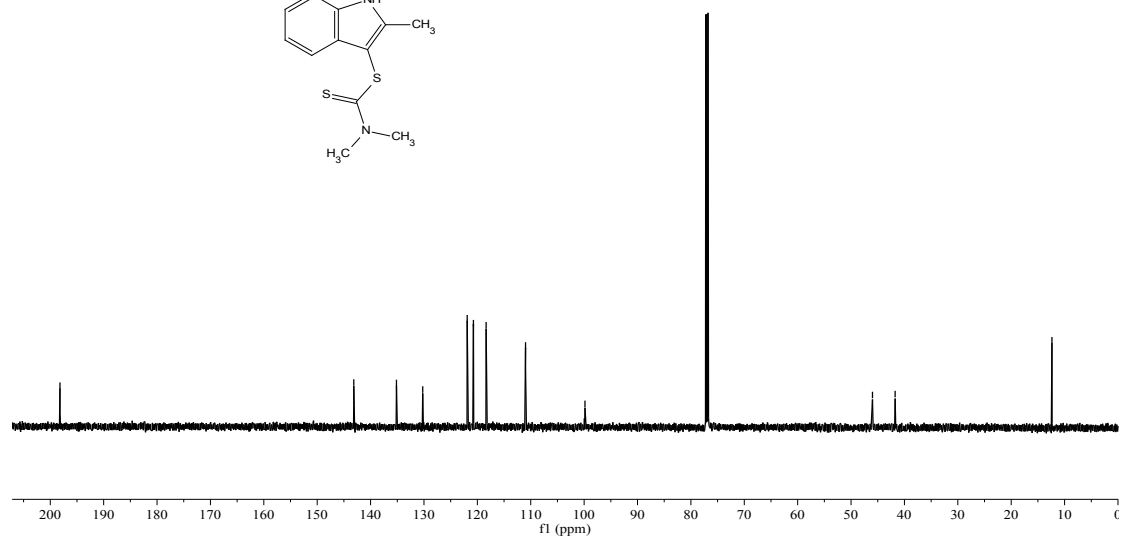

### 2-phenyl-1H-indol-3-yl dimethylcarbamodithioate(15)

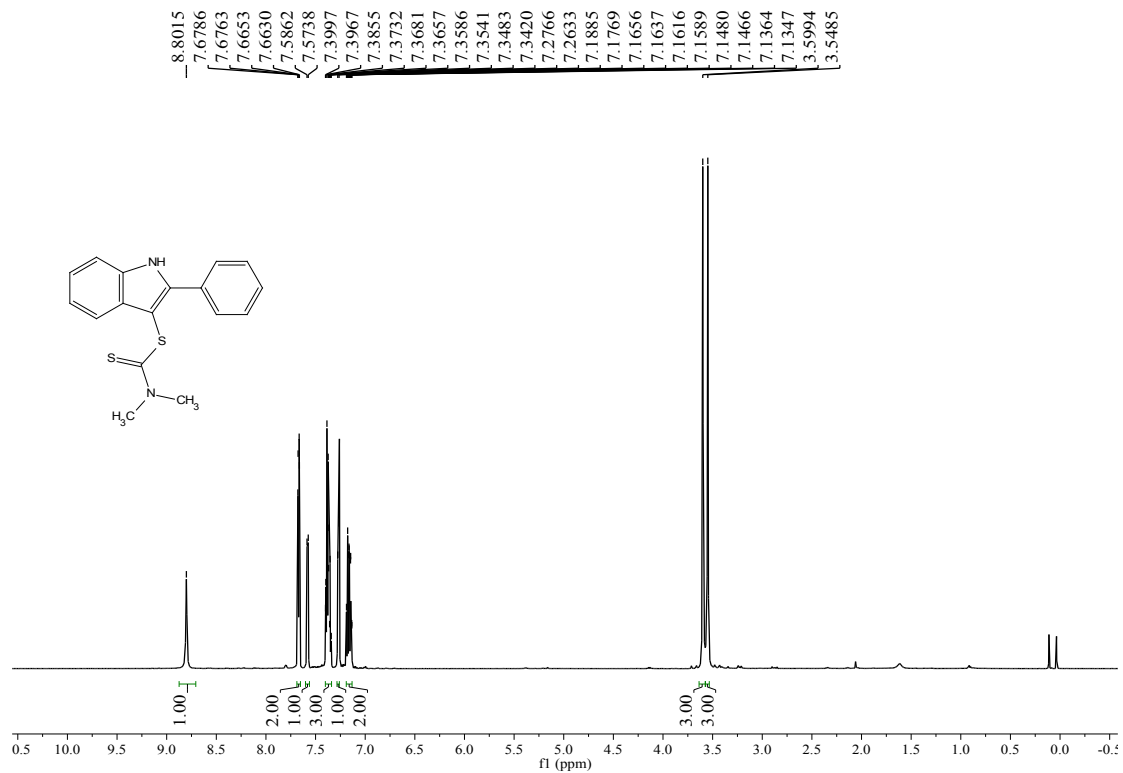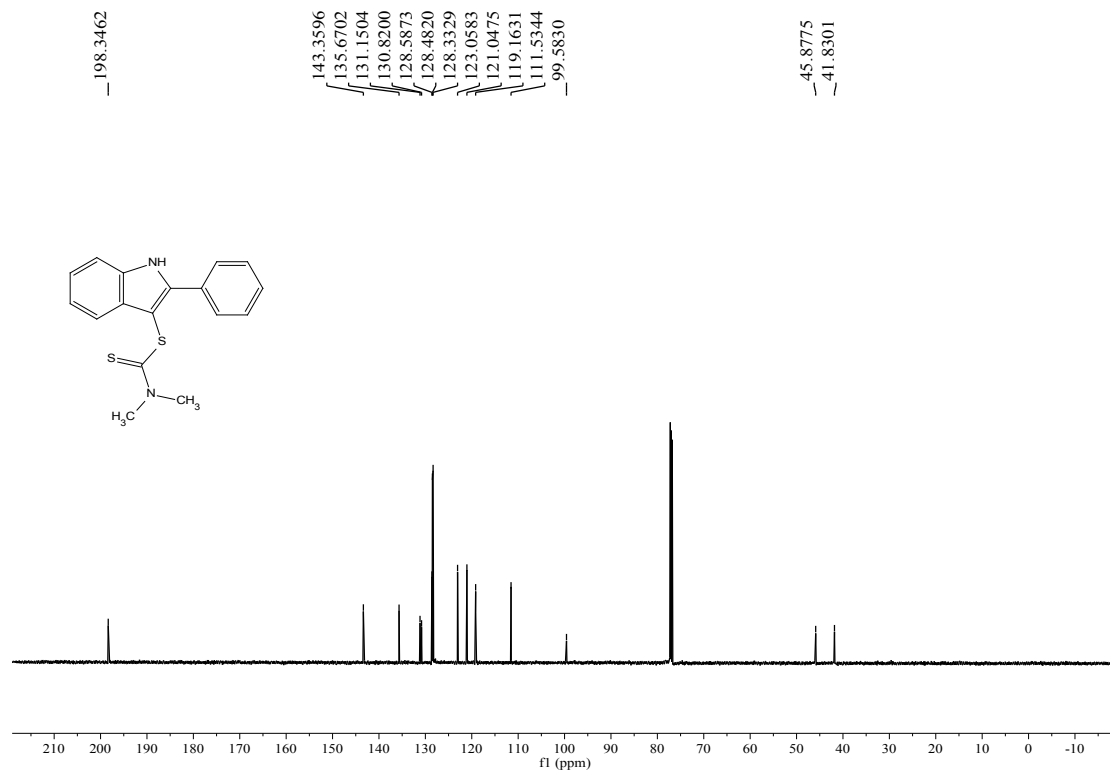

# 5-methyl-1H-indol-3-yl dimethylcarbamodithioate(16)

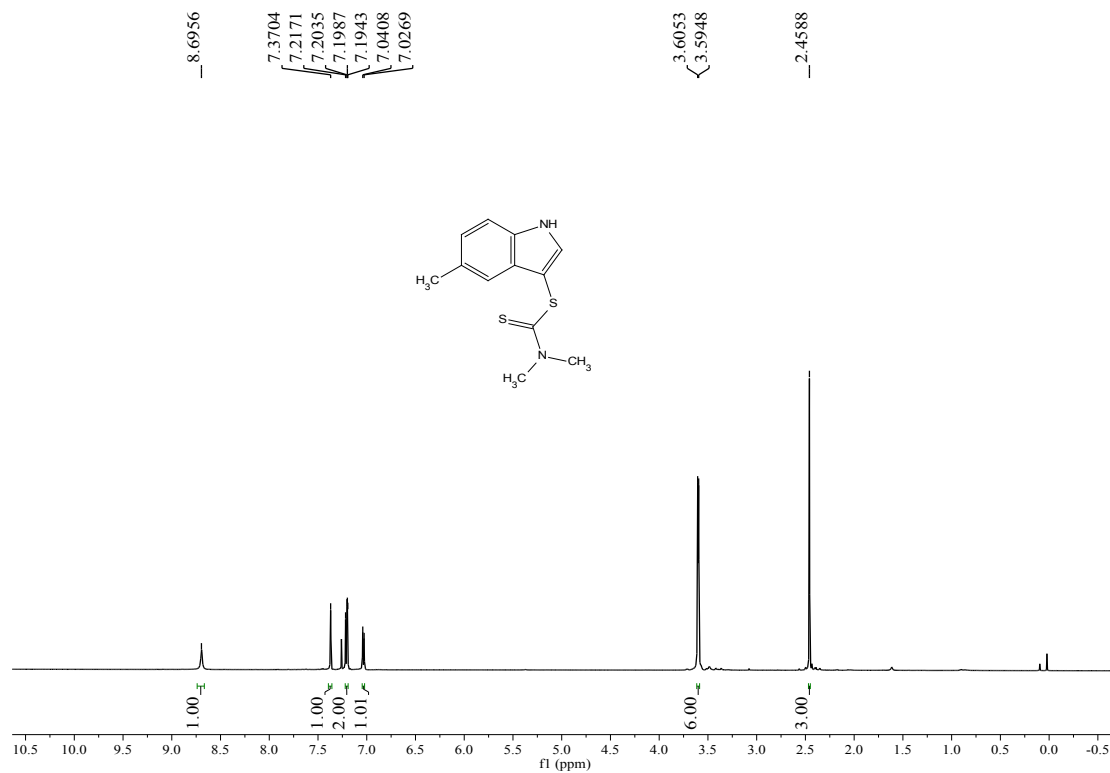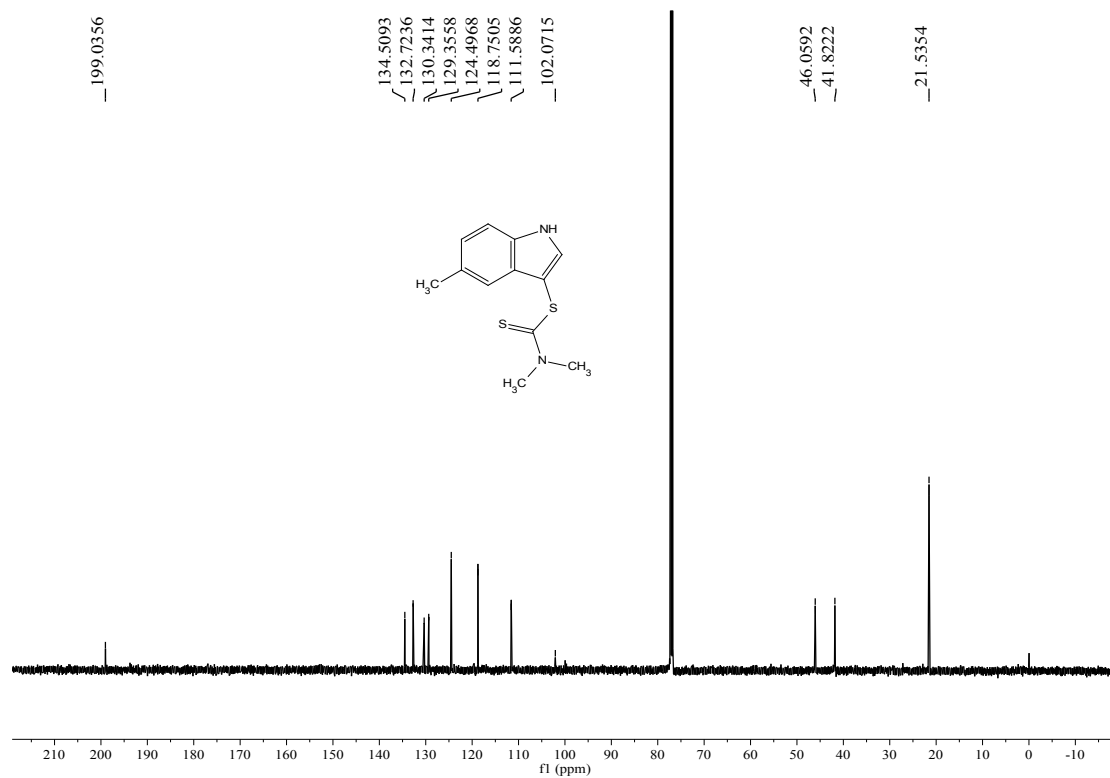

### 4-methyl-1H-indol-3-yl dimethylcarbamodithioate(17)

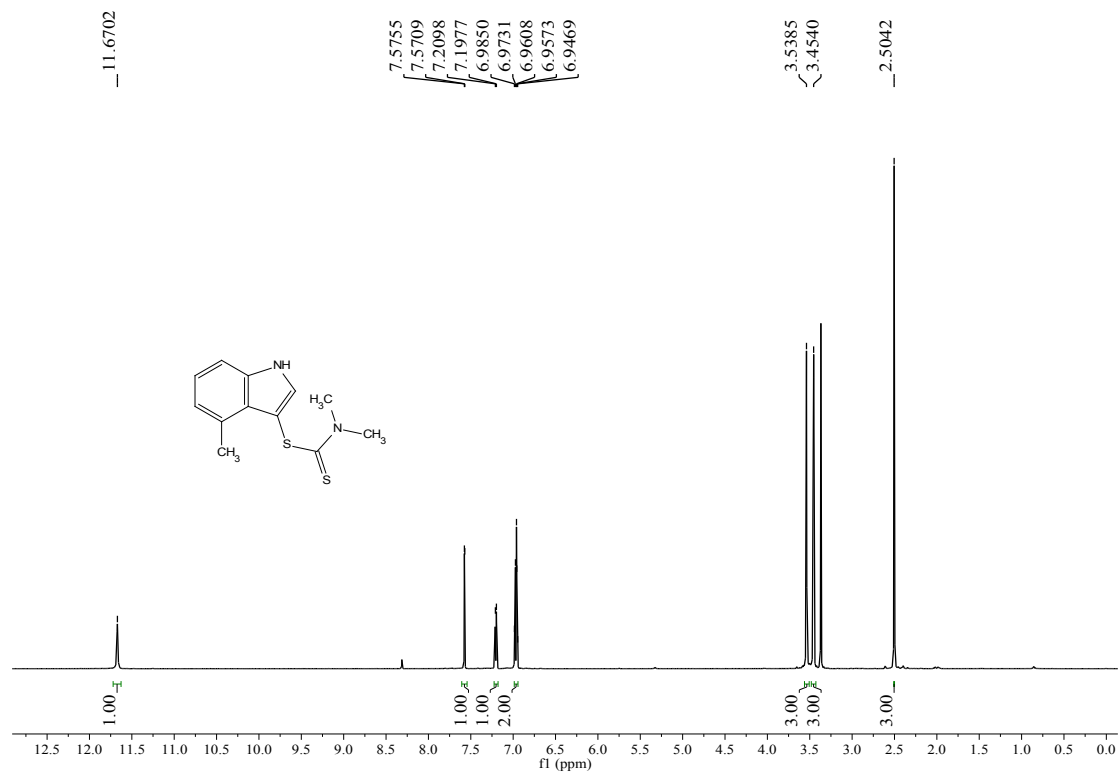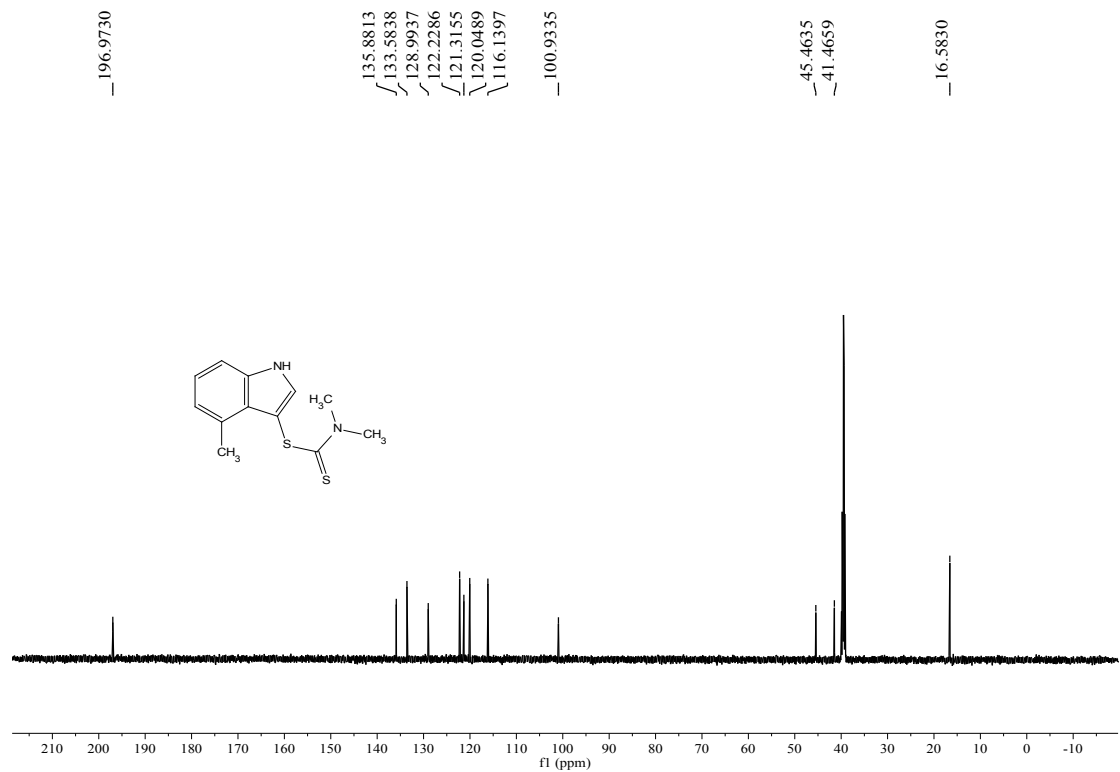



### 5-methoxy-1H-indol-3-yl dimethylcarbamodithioate(18)

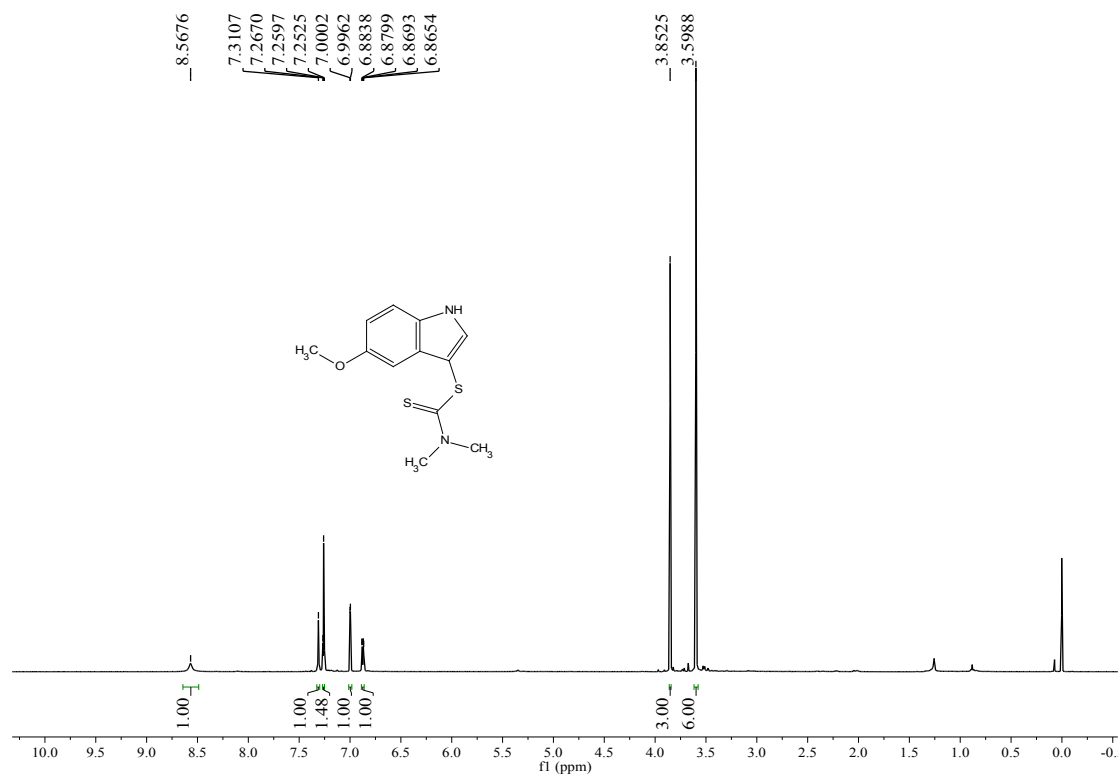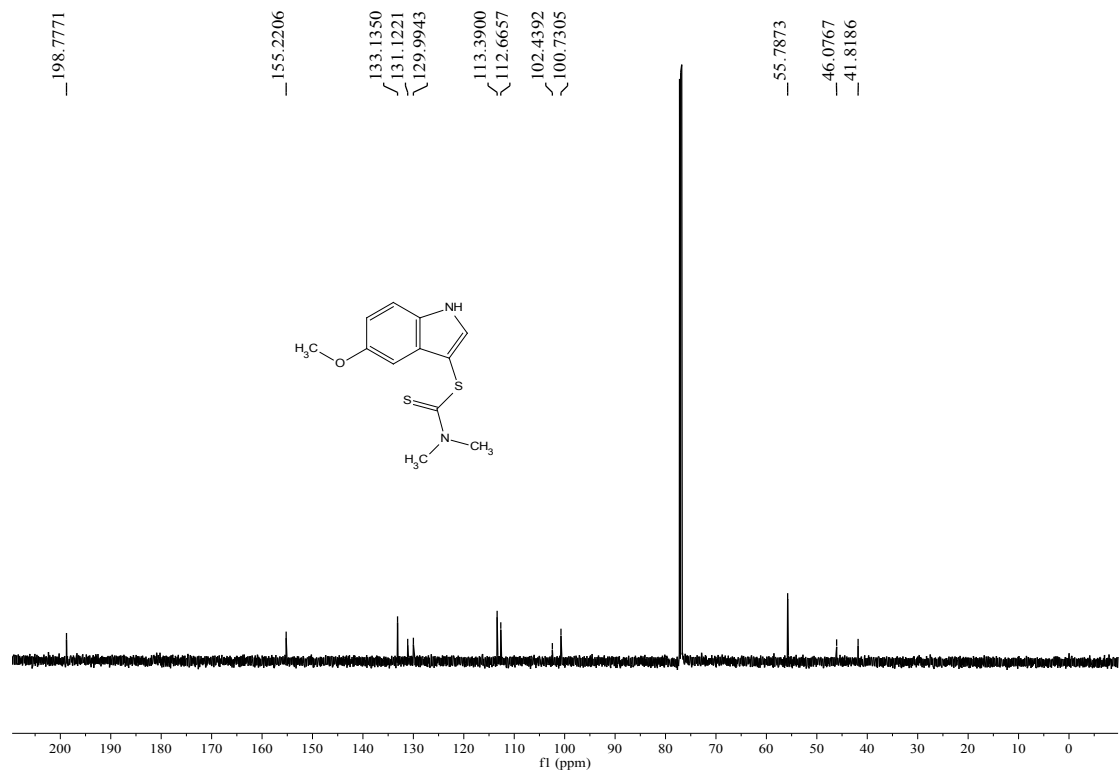

# 6-chloro-2-methyl-1H-indol-3-yl dimethylcarbamodithioate(19)

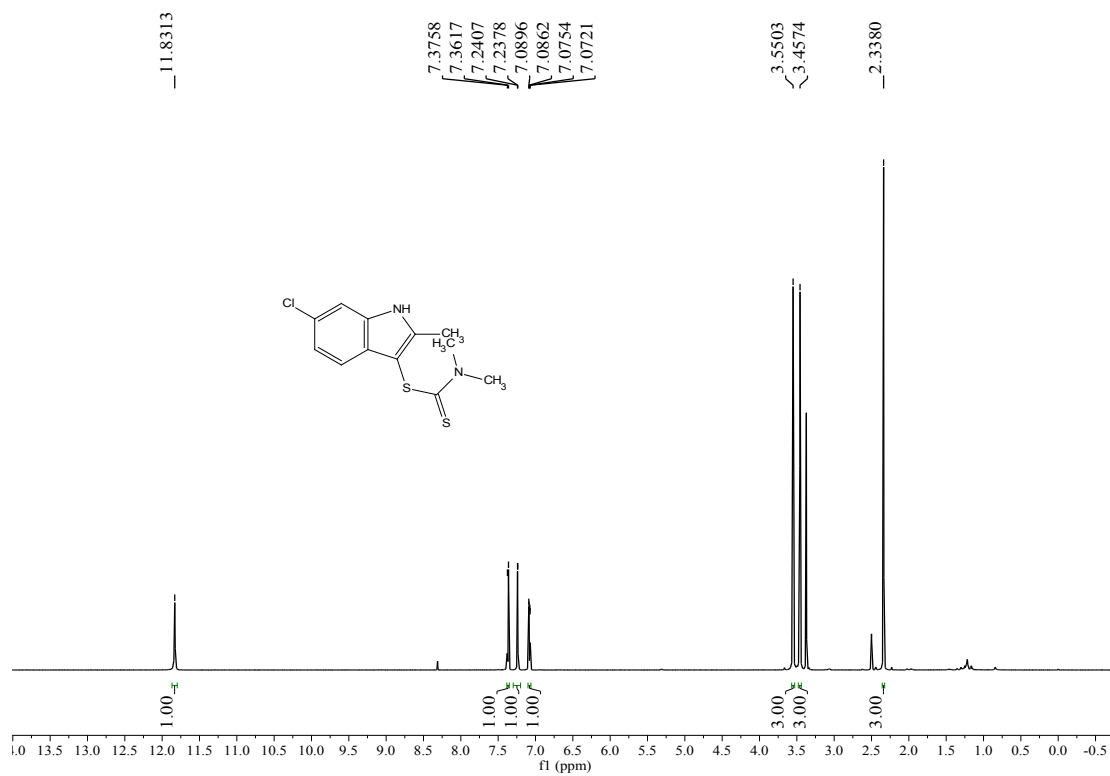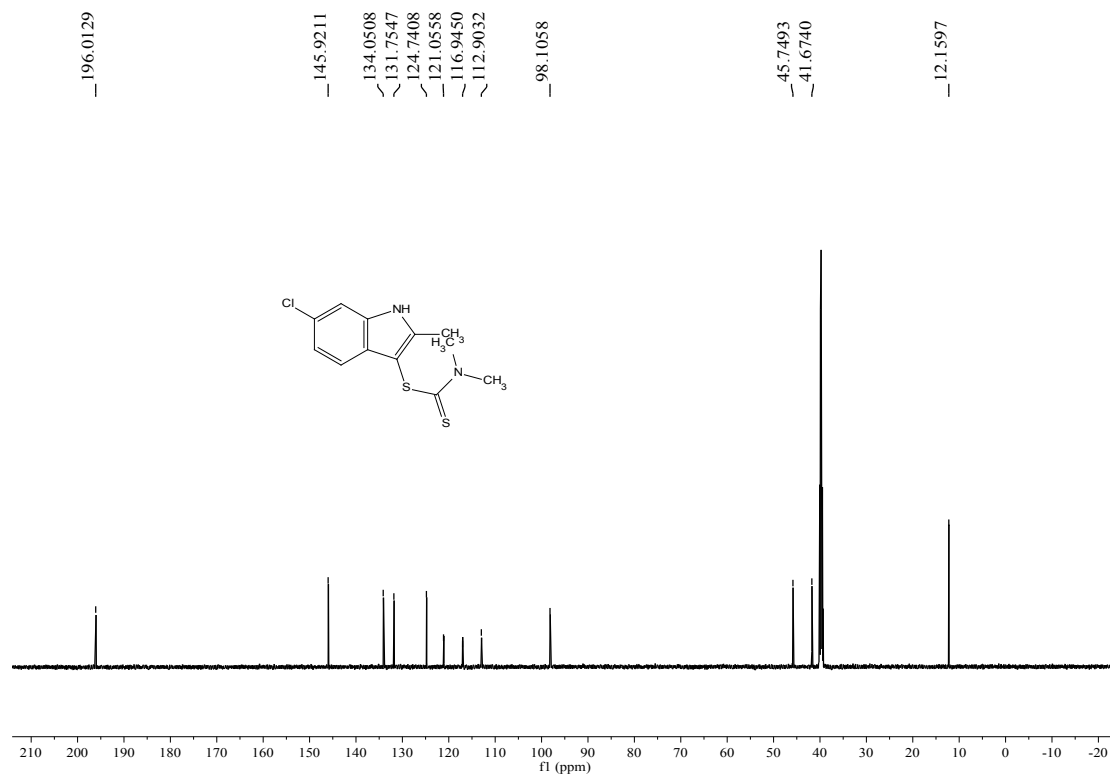

1-methyl-1H-indol-3-yl dimethylcarbamodithioate(20)

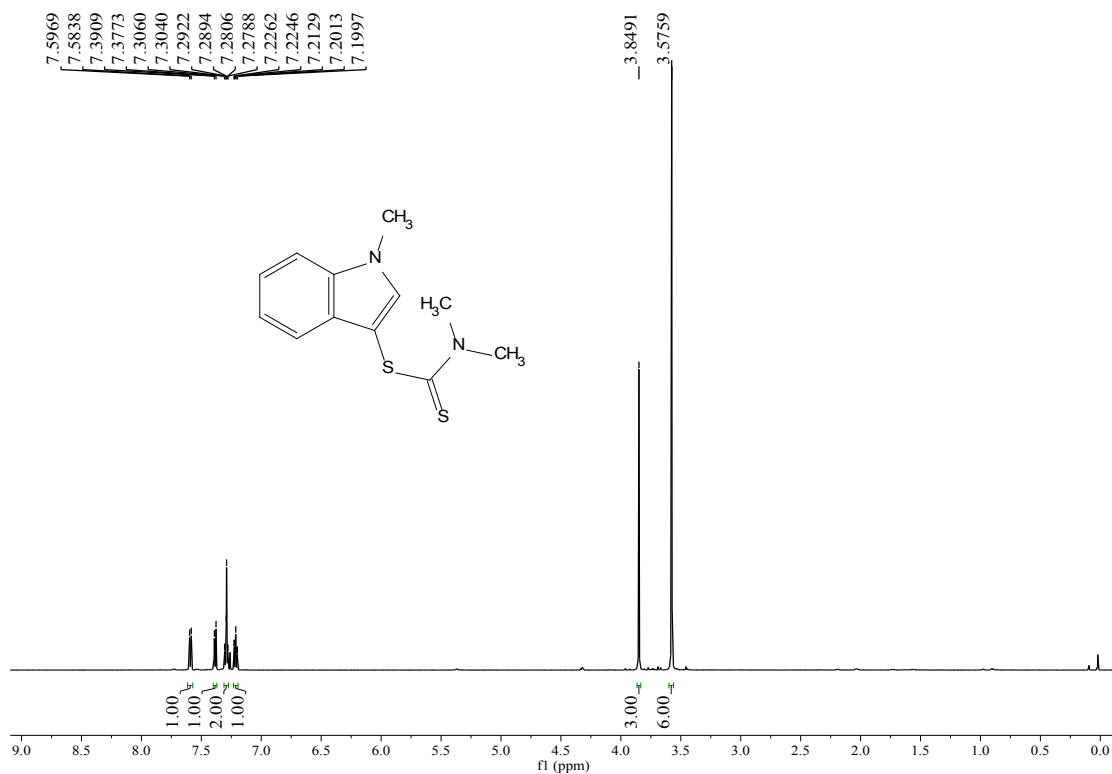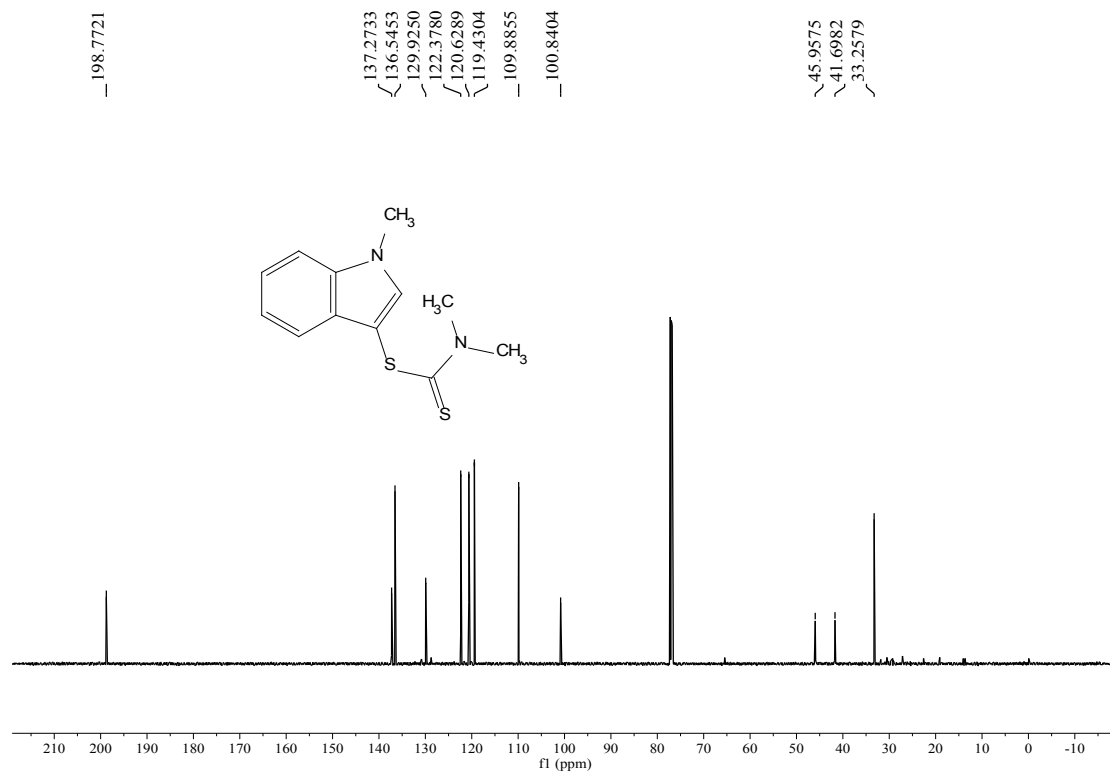

### 5-bromo-1-methyl-1H-indol-3-yl dimethylcarbamodithioate(21)

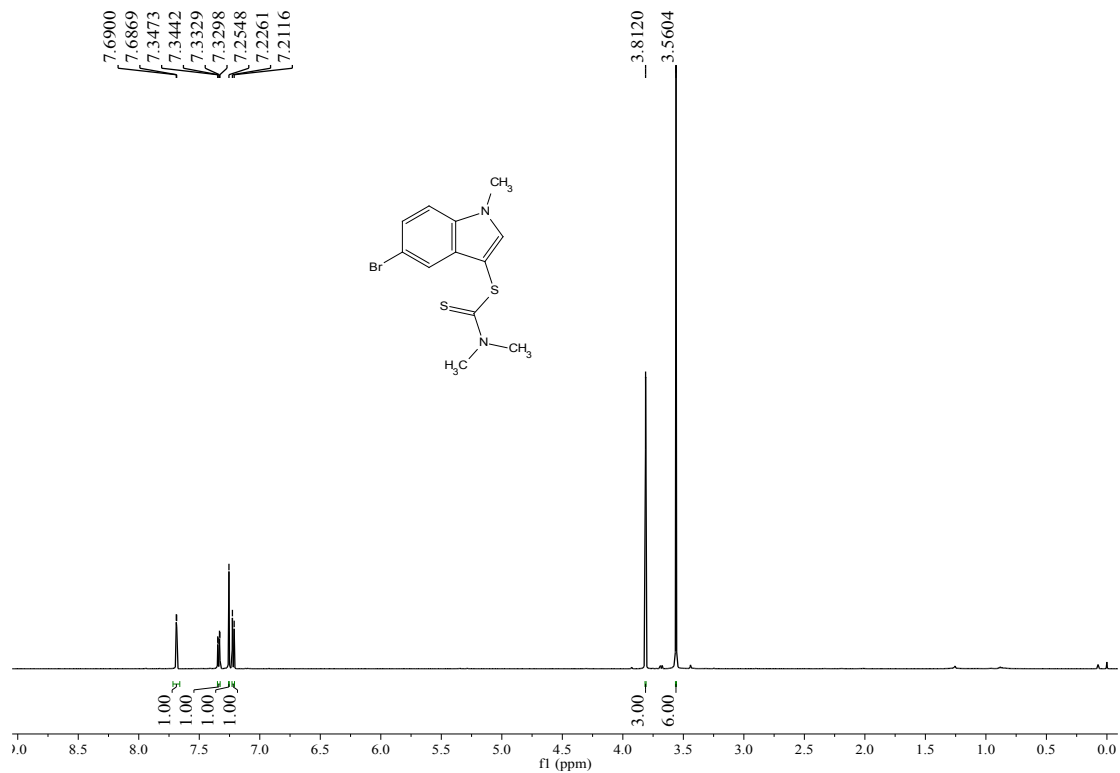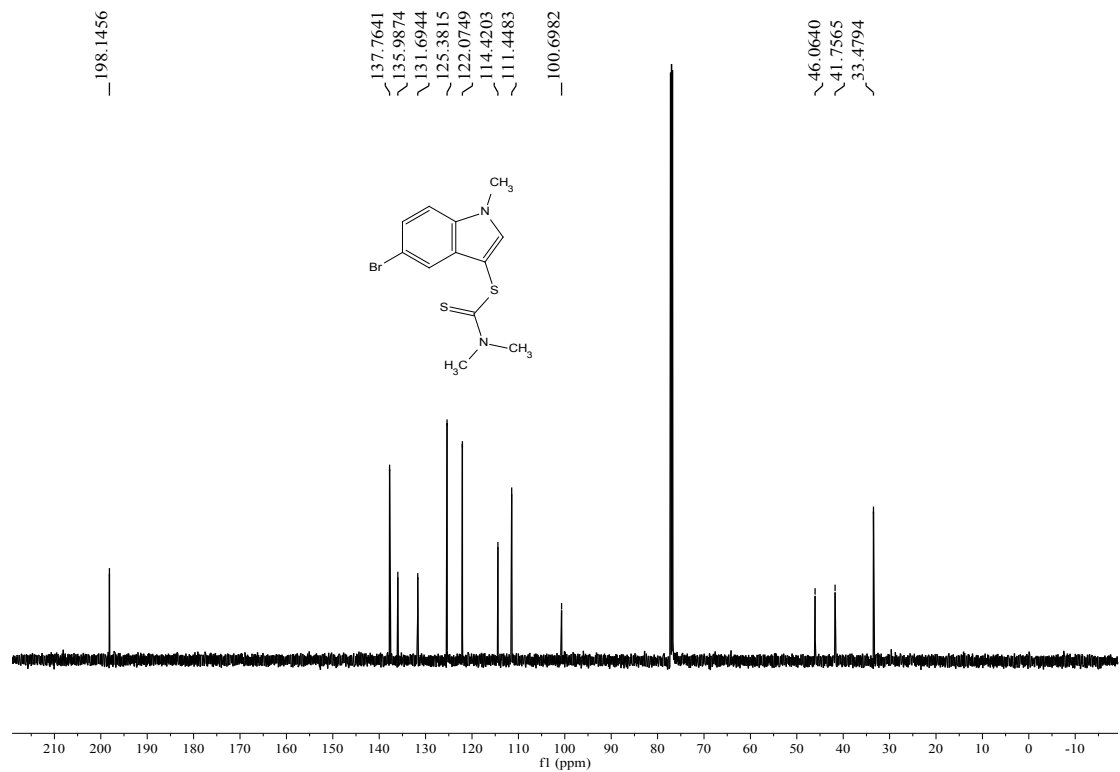

1-methyl-2-phenyl-1H-indol-3-yl dimethylcarbamodithioate(22)

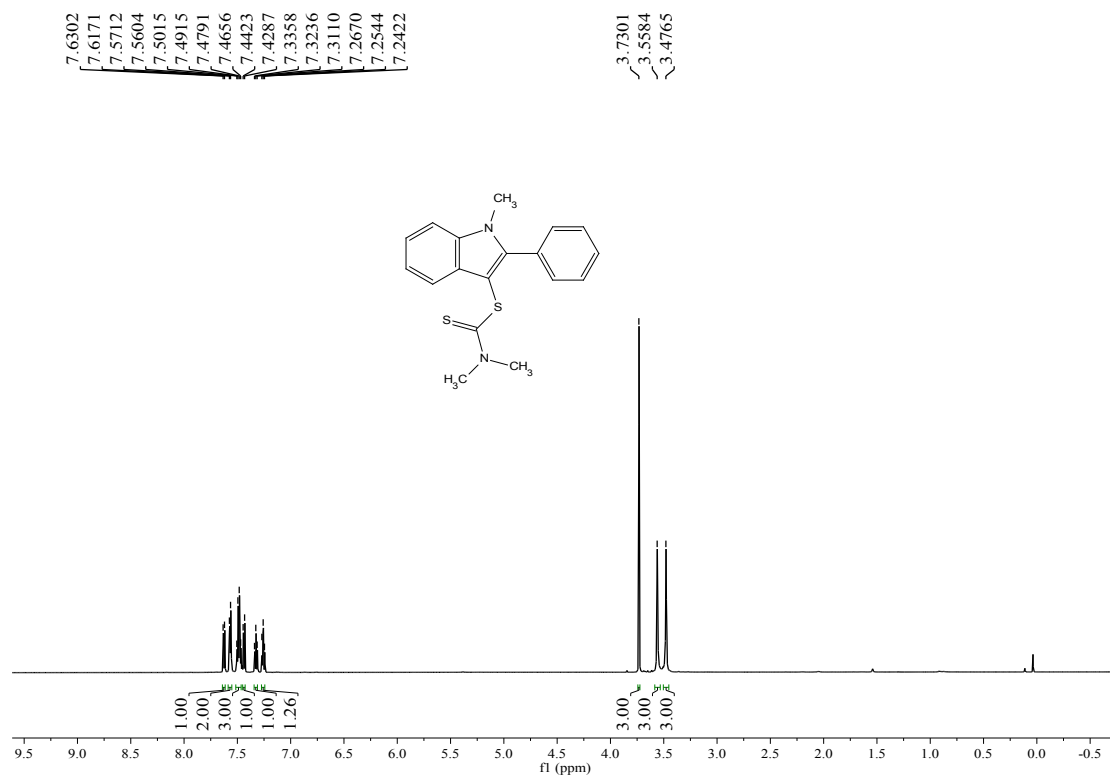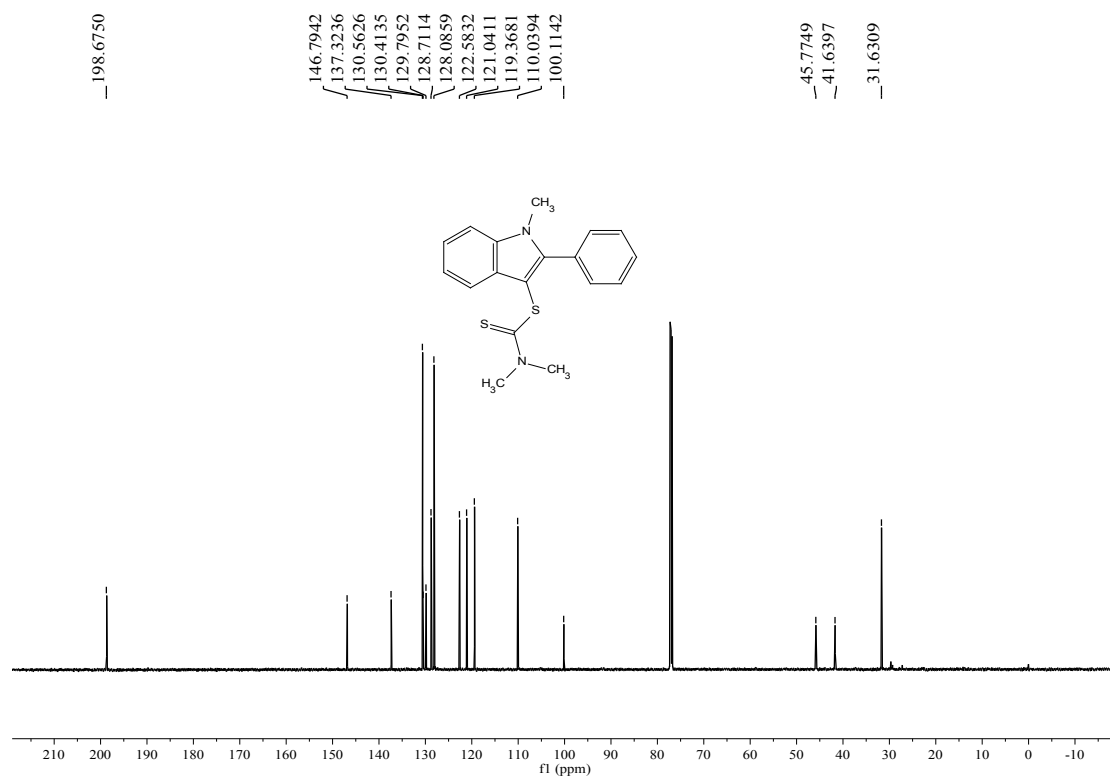

1-ethyl-2-phenyl-1H-indol-3-yl dimethylcarbamodithioate(23)

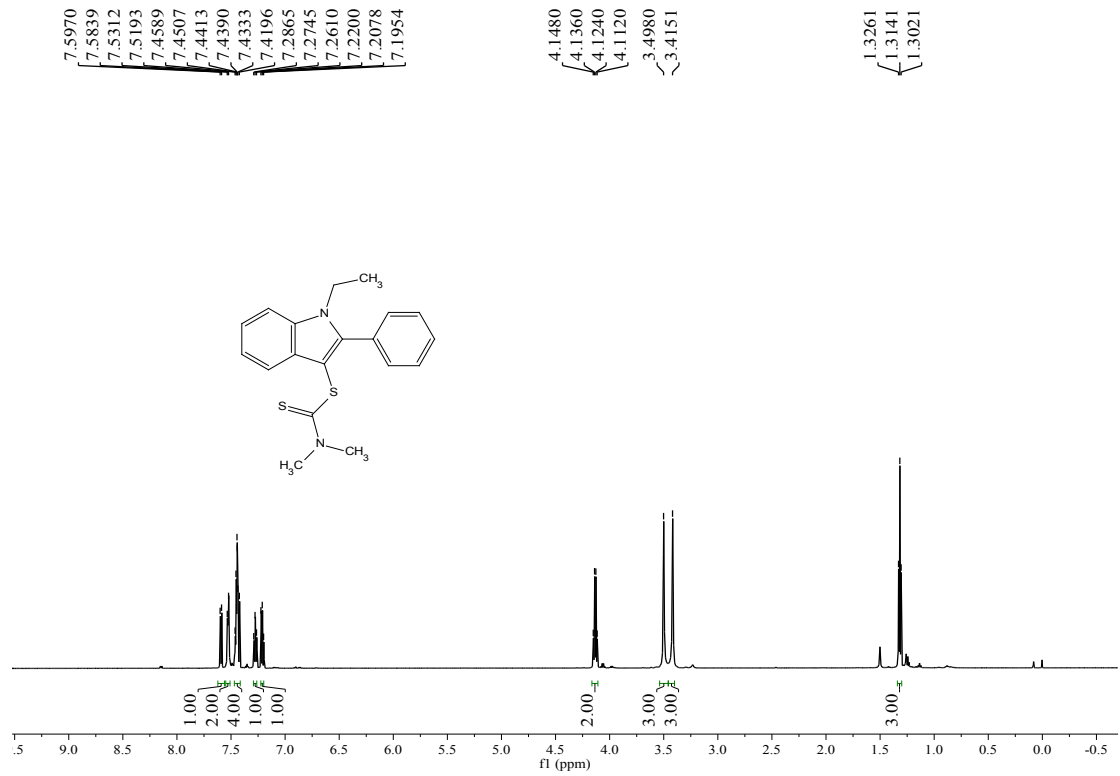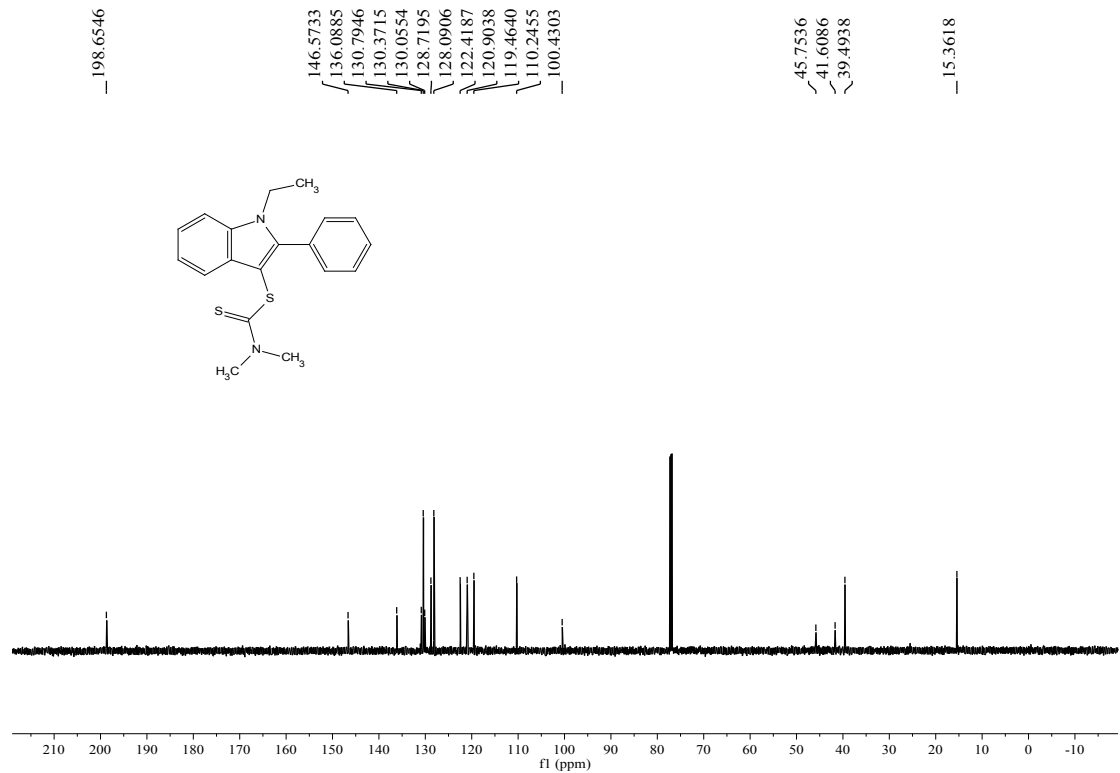

1-butyl-1H-indol-3-yl dimethylcarbamodithioate(24)

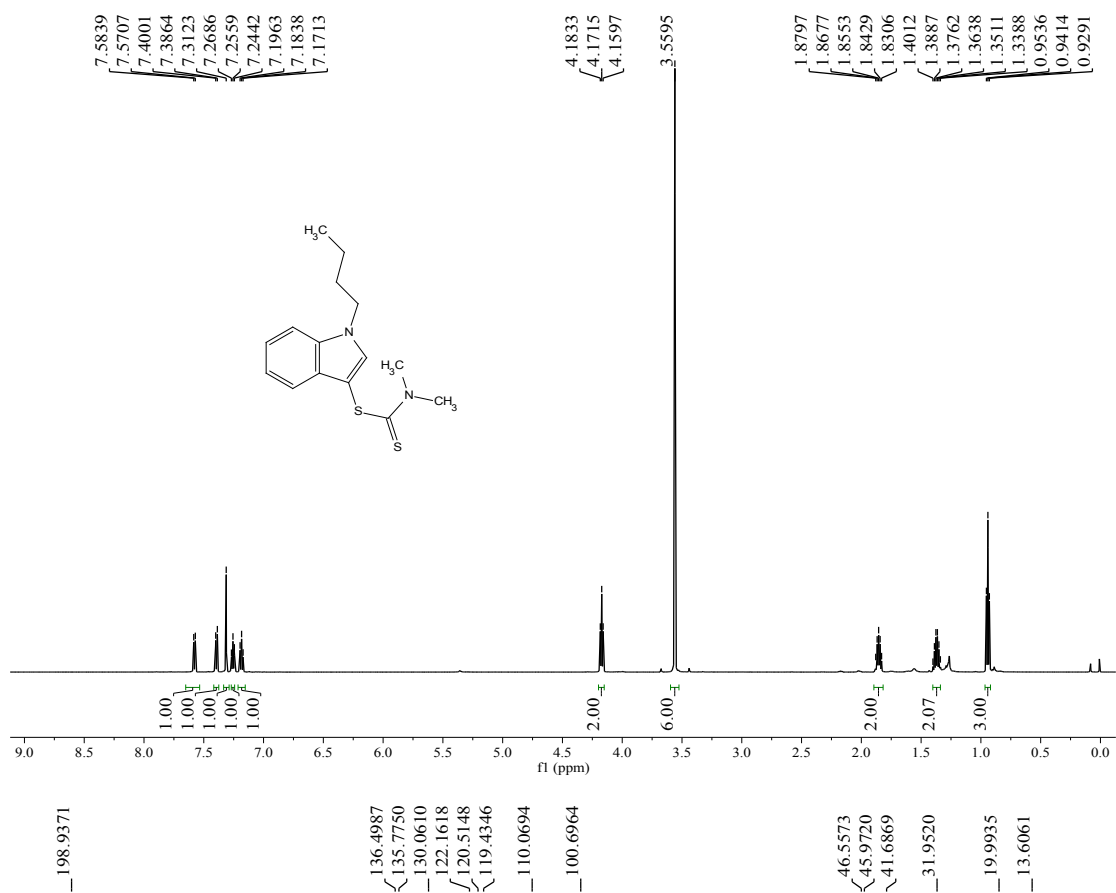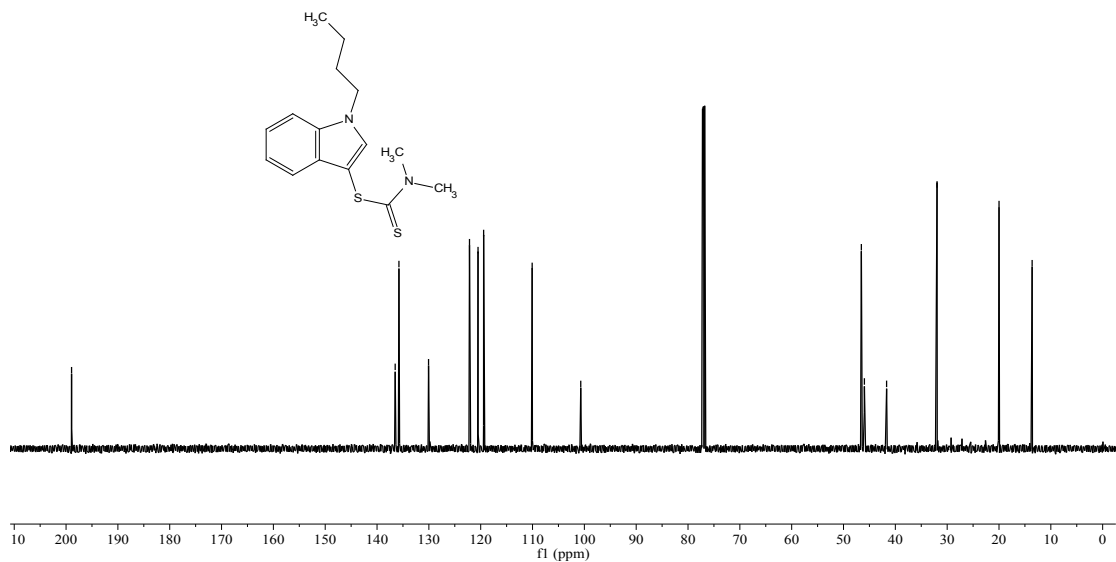

# 1H-indol-3-yl diethylcarbamidithioate(25)

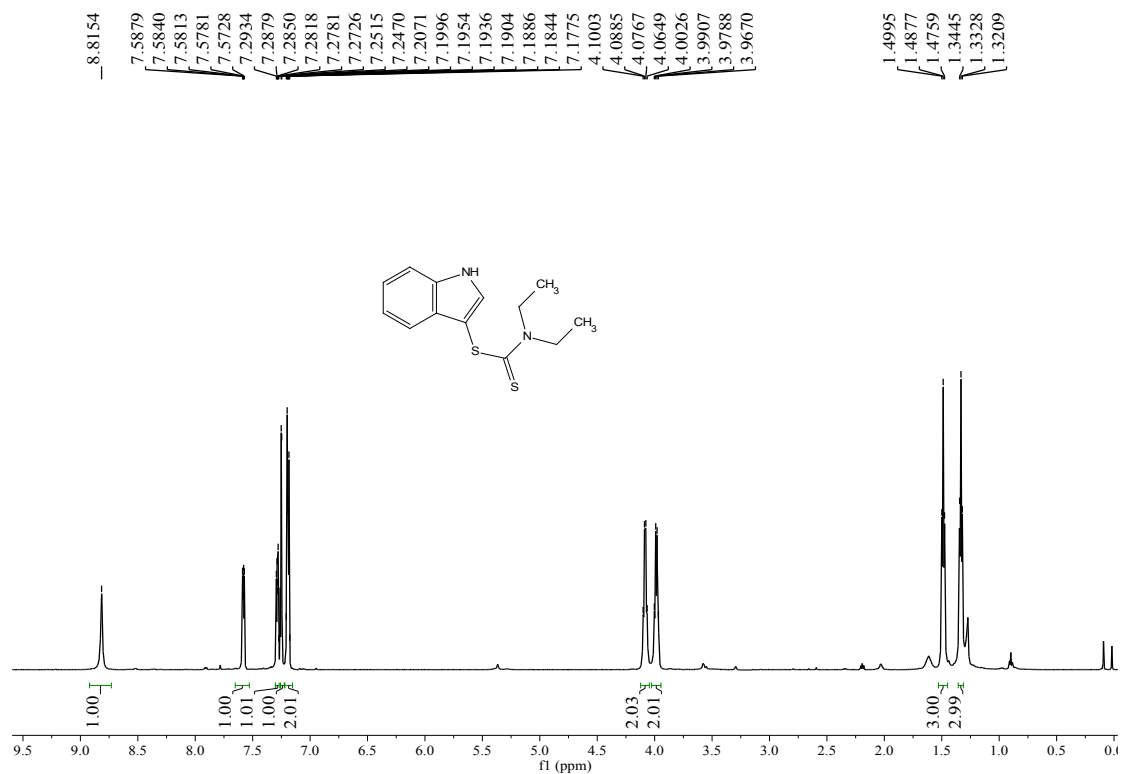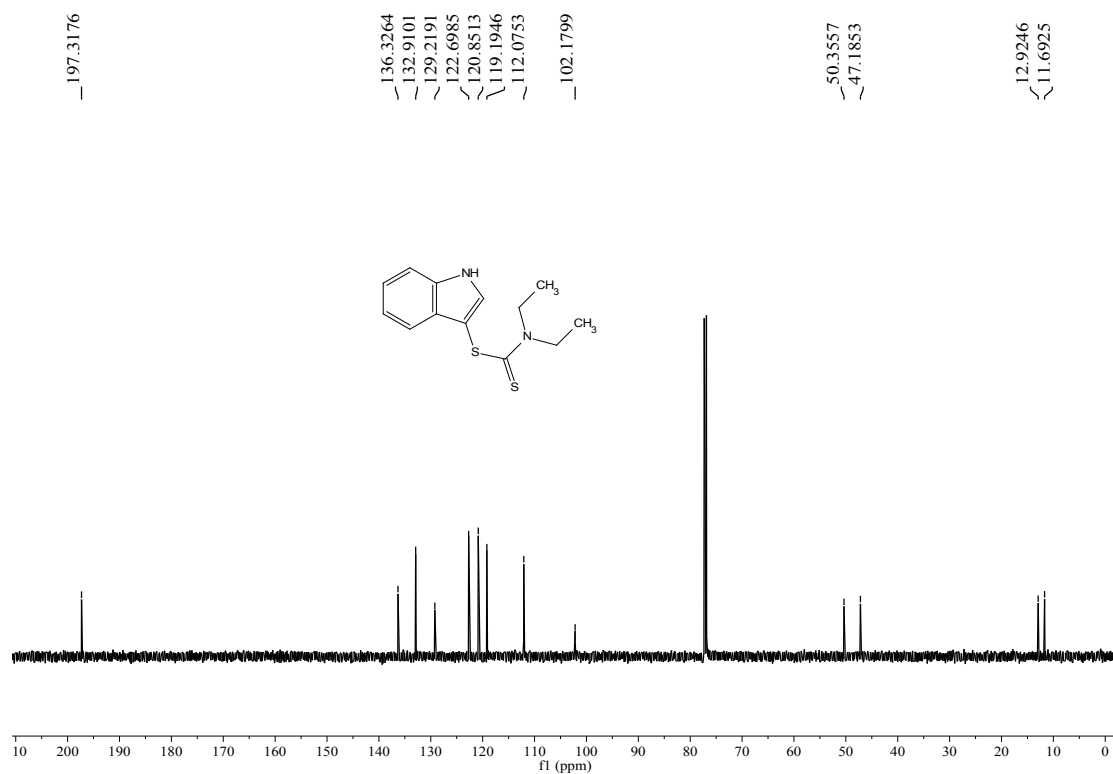



2-methyl-1H-indol-3-yl diethylcarbamodithioate(26)

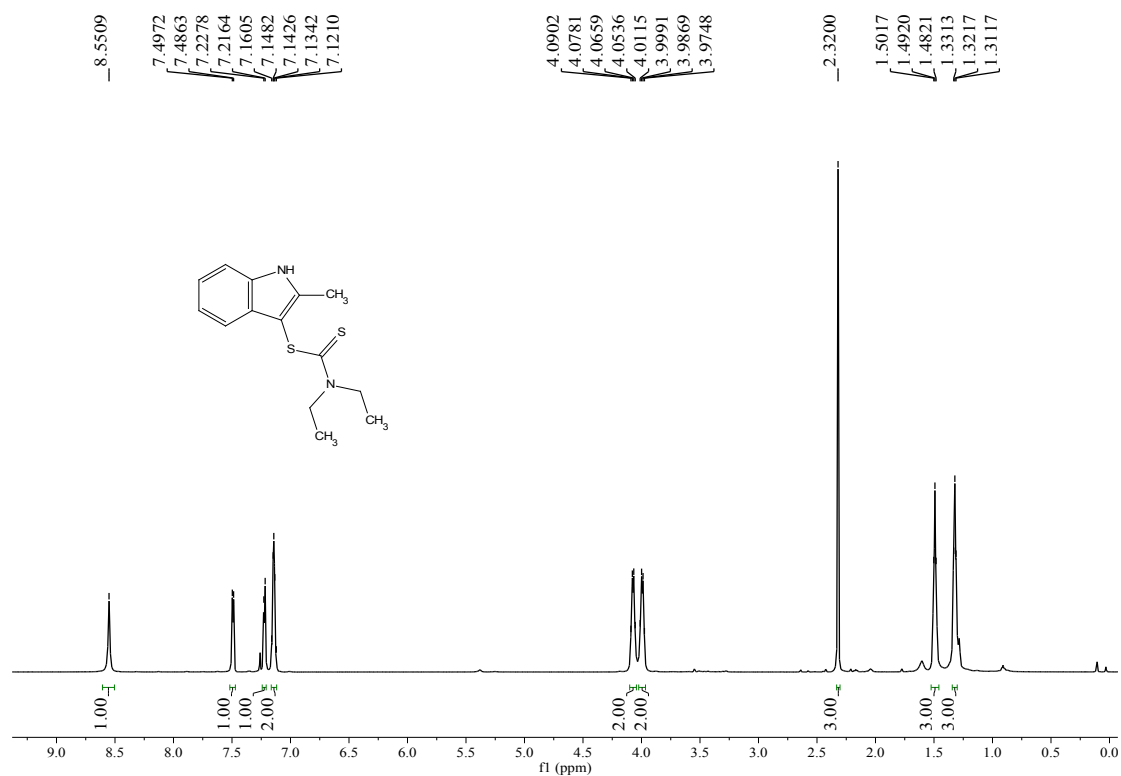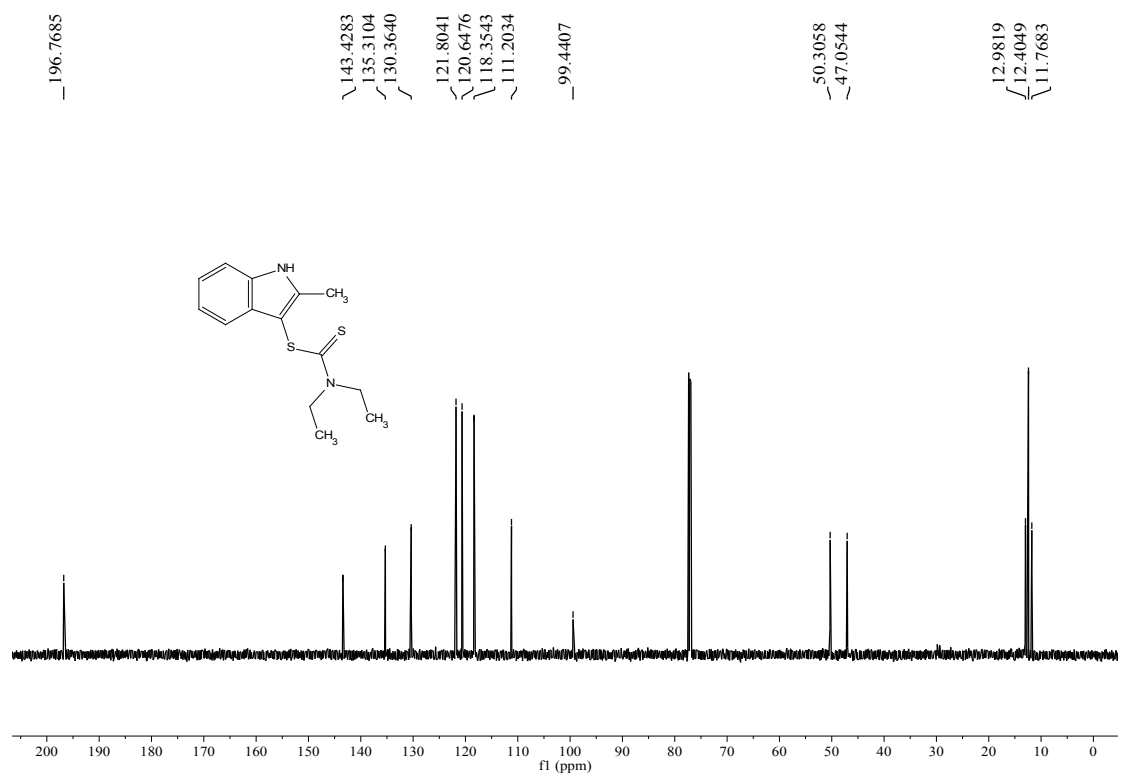

1-methyl-1H-indol-3-yl diethylcarbamodithioate(27)

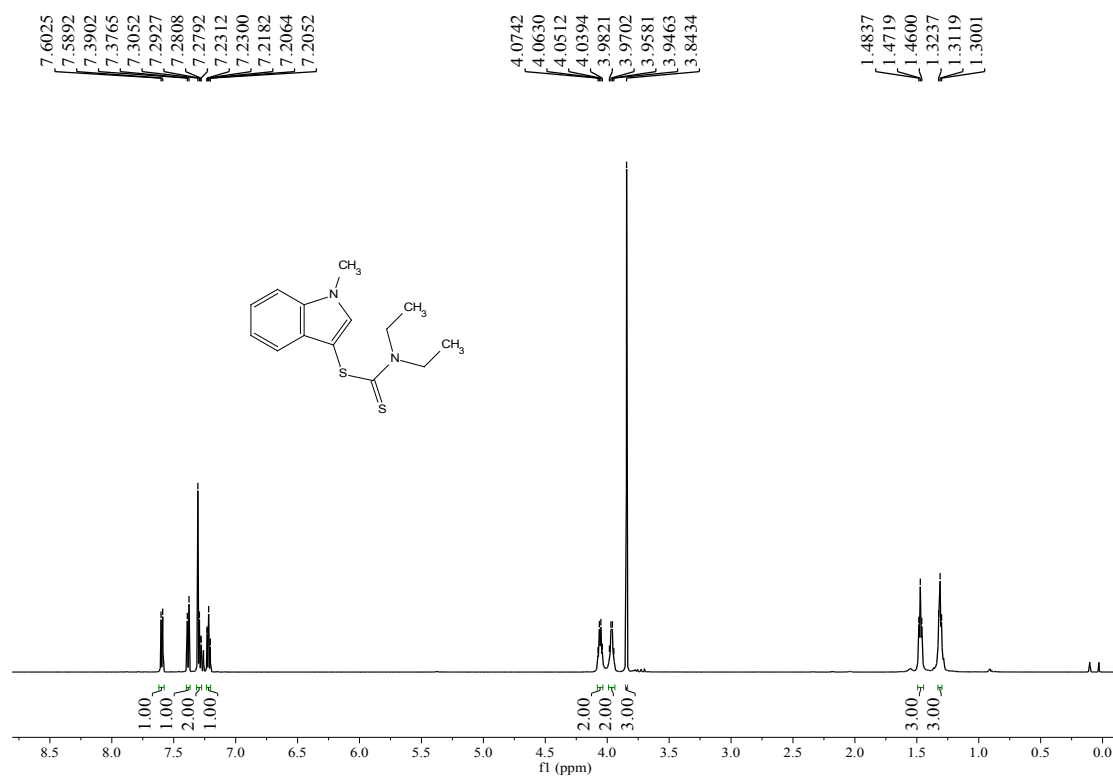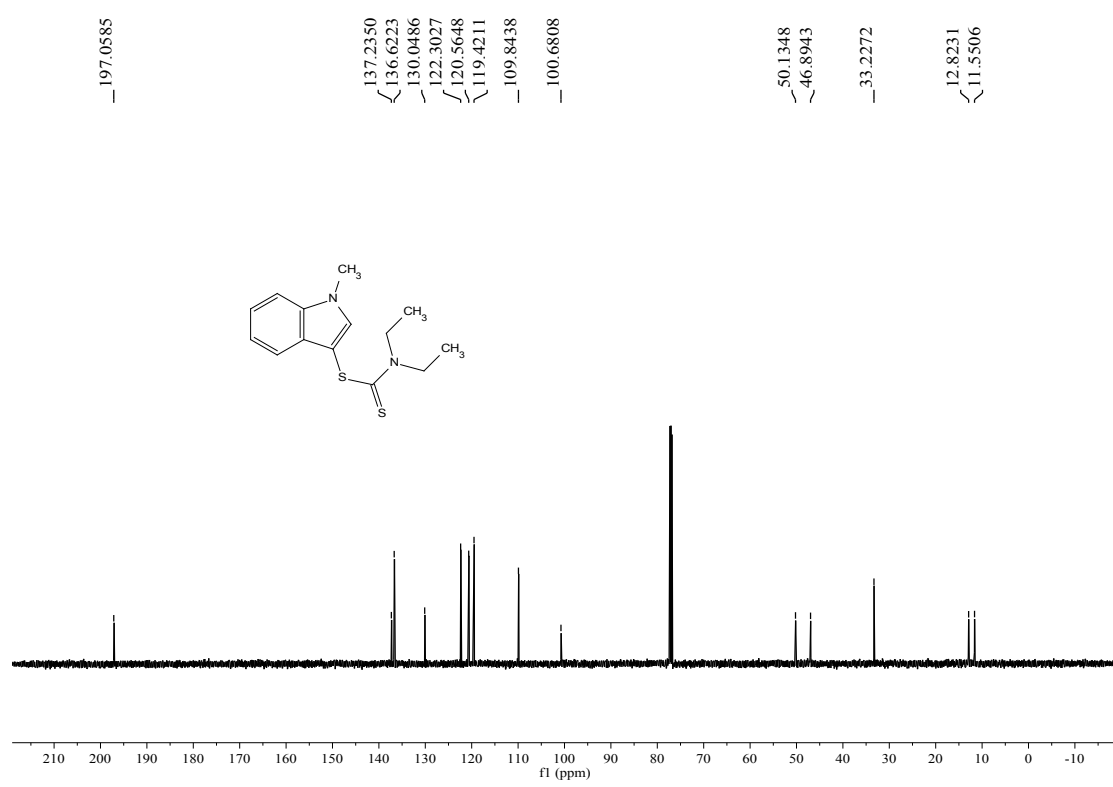

**2-methyl-1H-indol-3-yl diisopropylcarbamodithioate(28)**

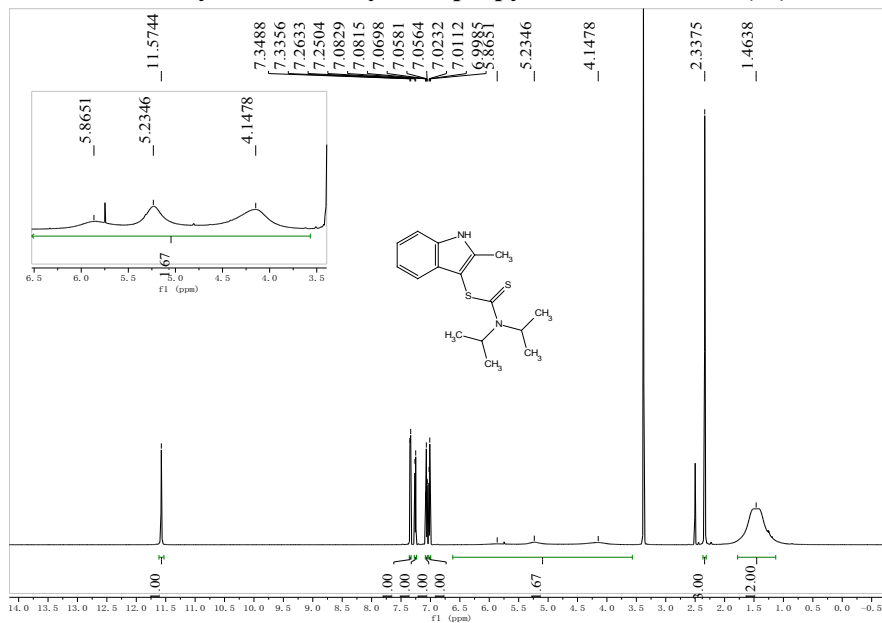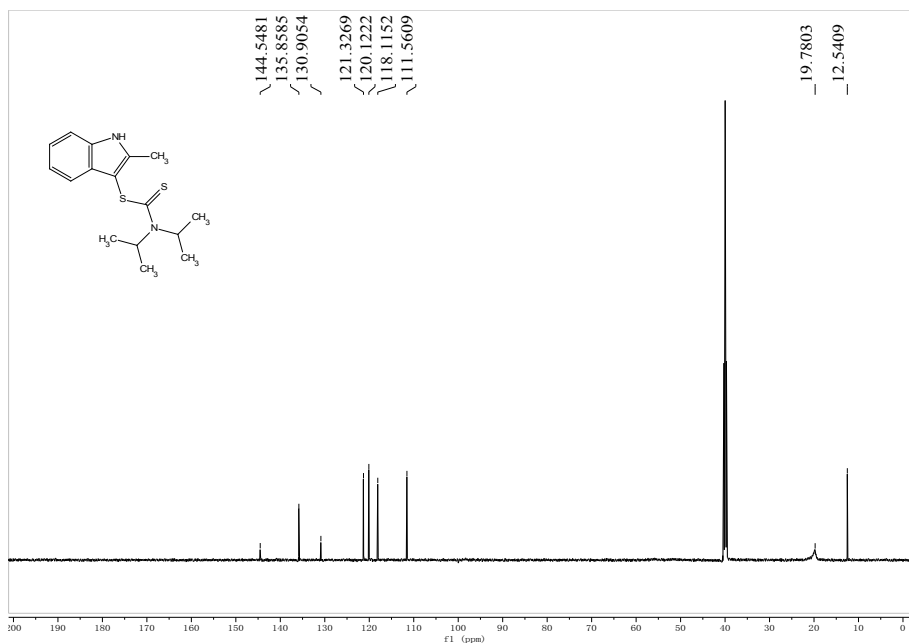

223 #24 RT: 0.35 AV: 1 NL: 4.74E6  
T: FTMS + p ESI Full ms [100.00-1000.00]

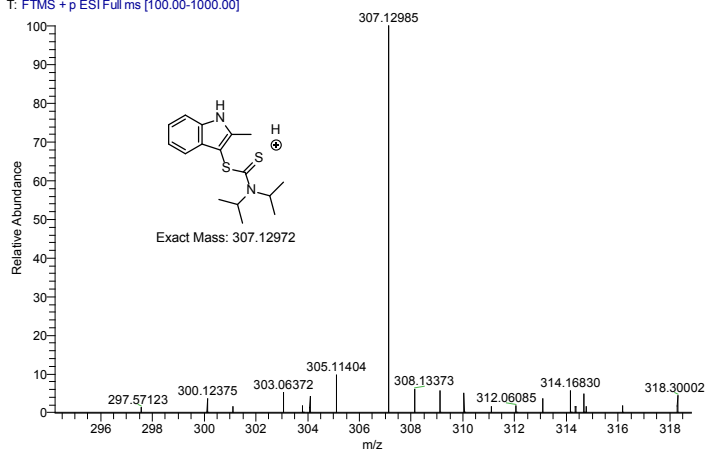

# 5,6-dihydro-4H-pyrrolo[3,2,1-ij]quinolin-1-yl dimethylcarbamodithioate (29)

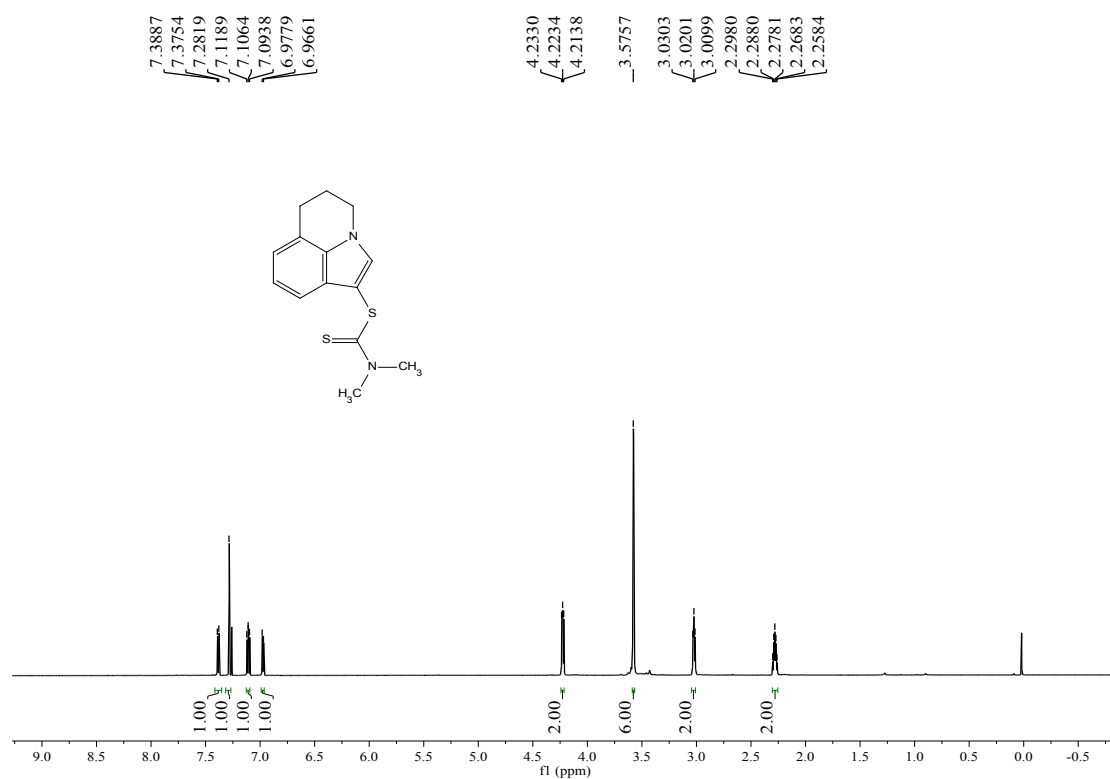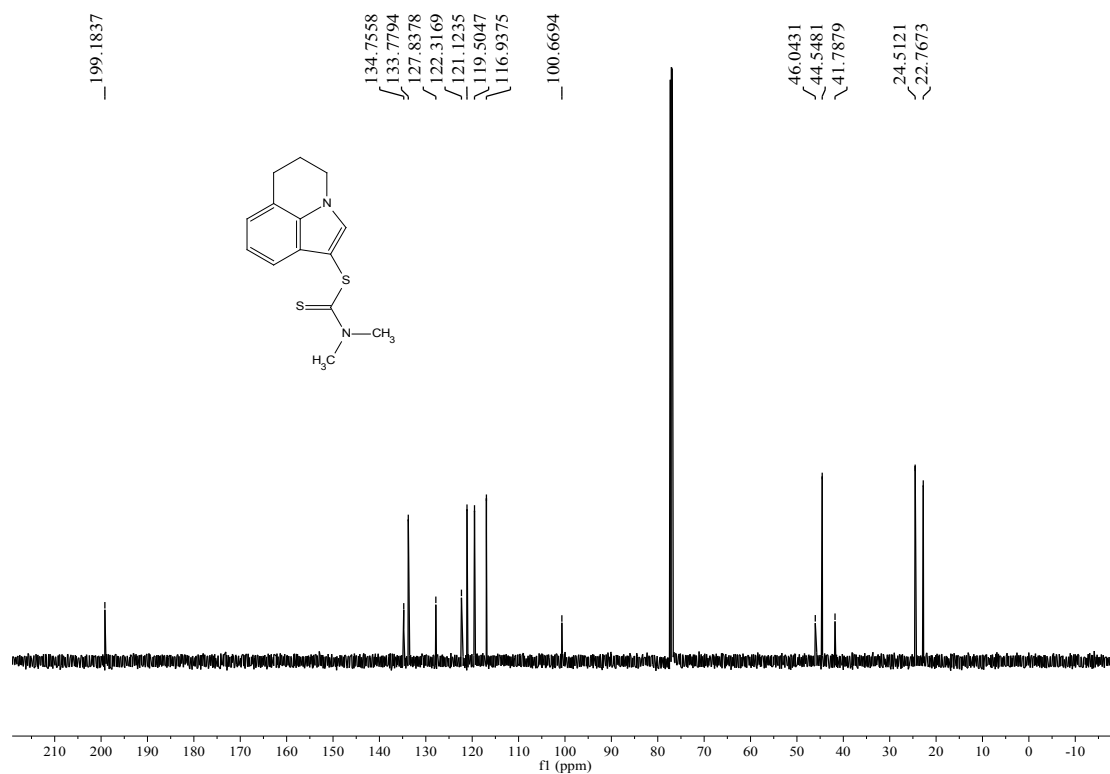

1,2,3,5,6,7-hexahydropyrido[3,2,1-ij]quinolin-9-yl dimethylcarbamodithioate(30)

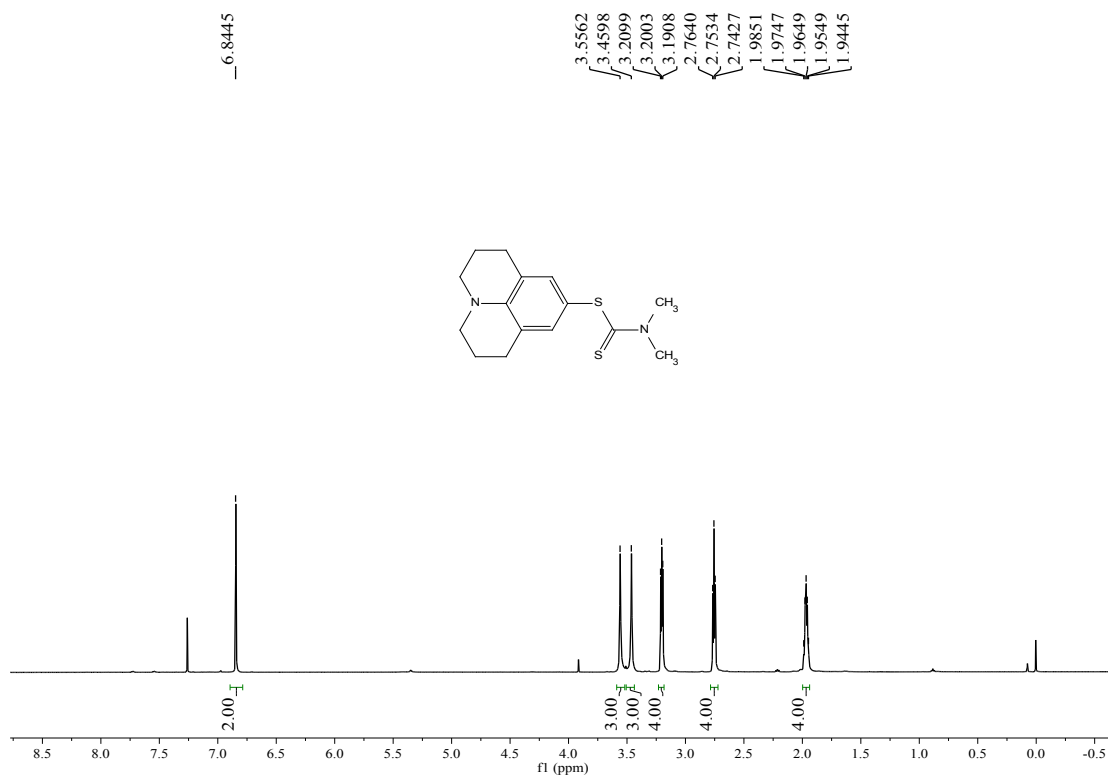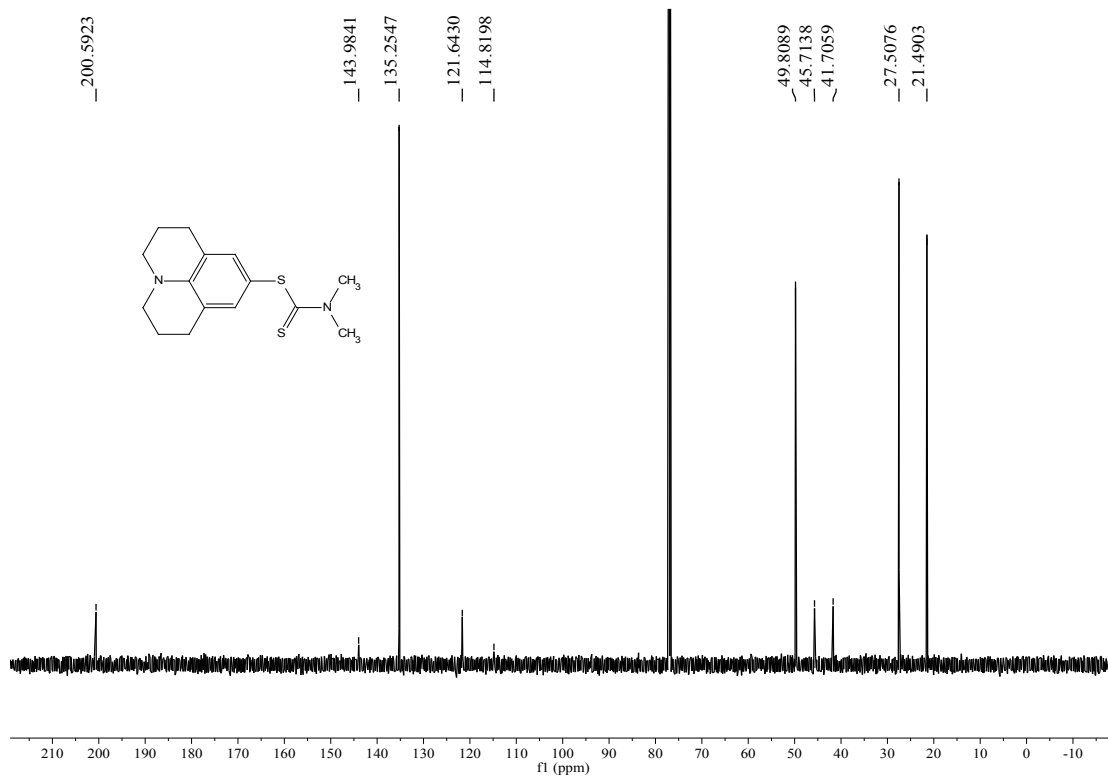

# 2,4,6-trimethoxyphenyl dimethylcarbamodithioate(31)

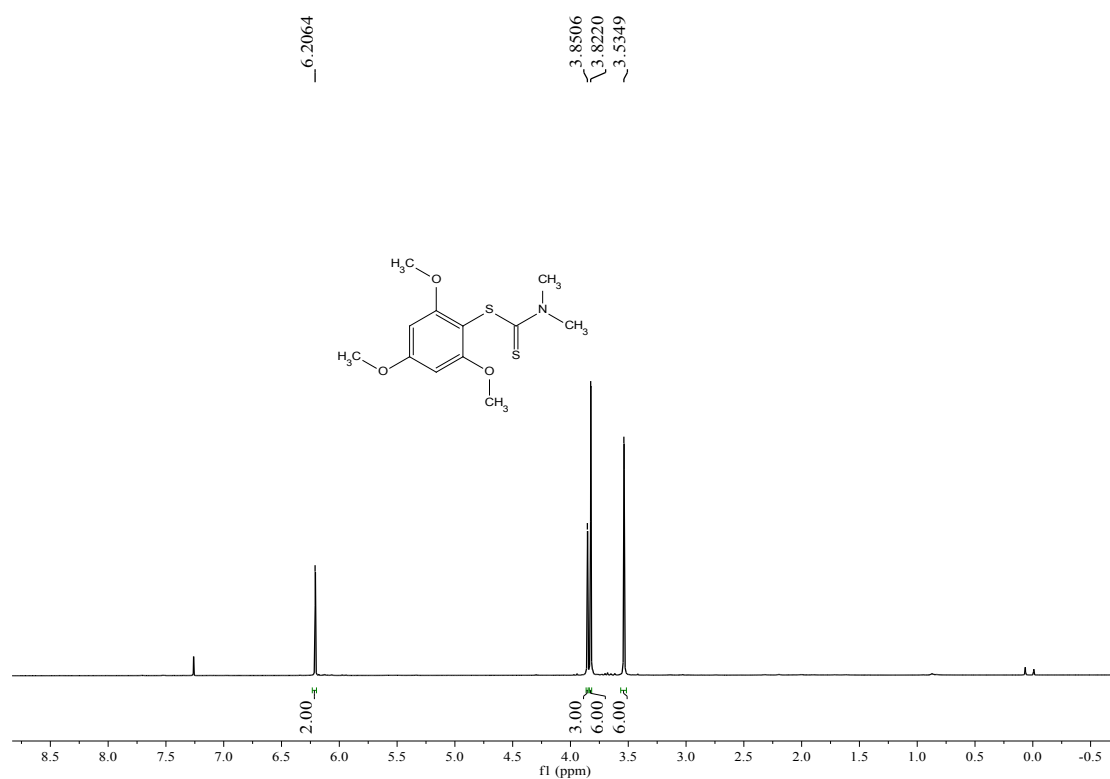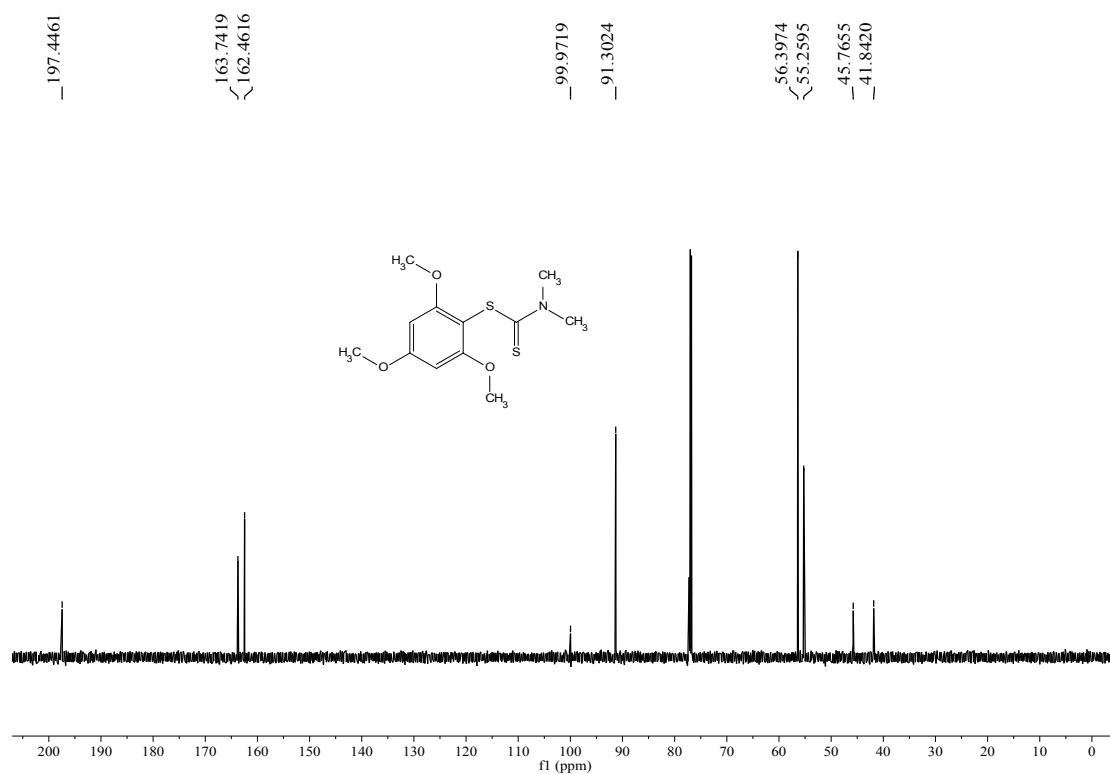

### 4-iodo-1-methyl-1H-pyrazol-5-amine (32)

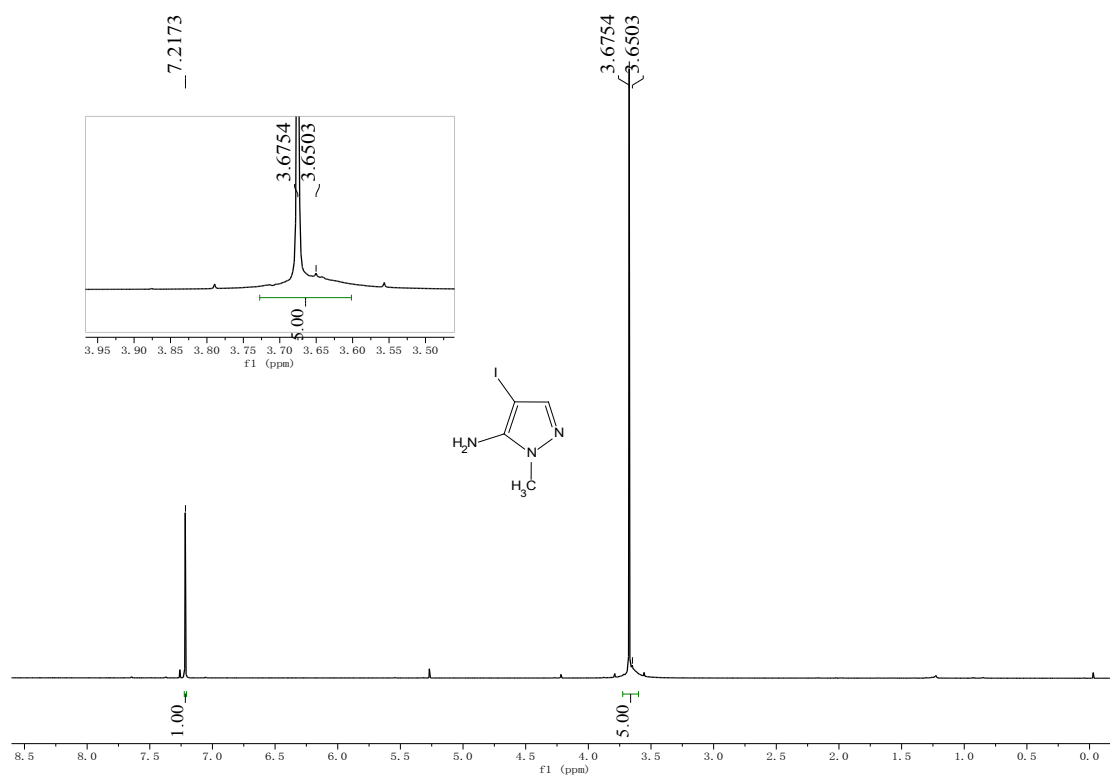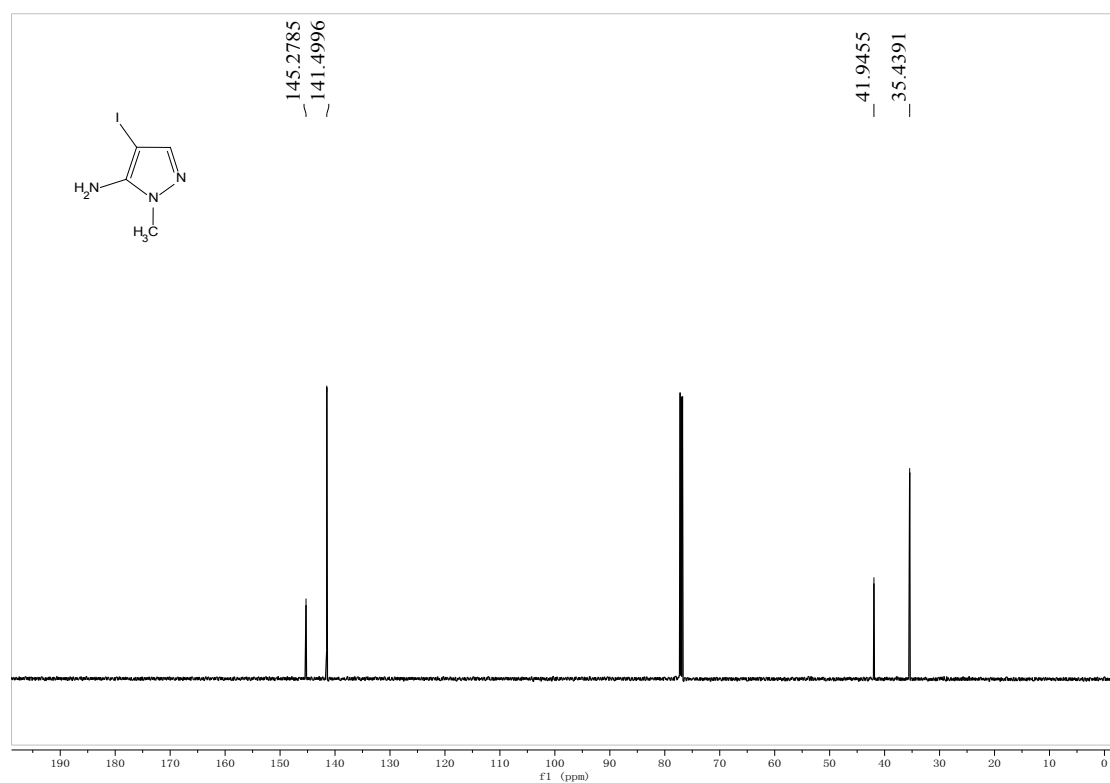

3-iodo-1H-indole (33)

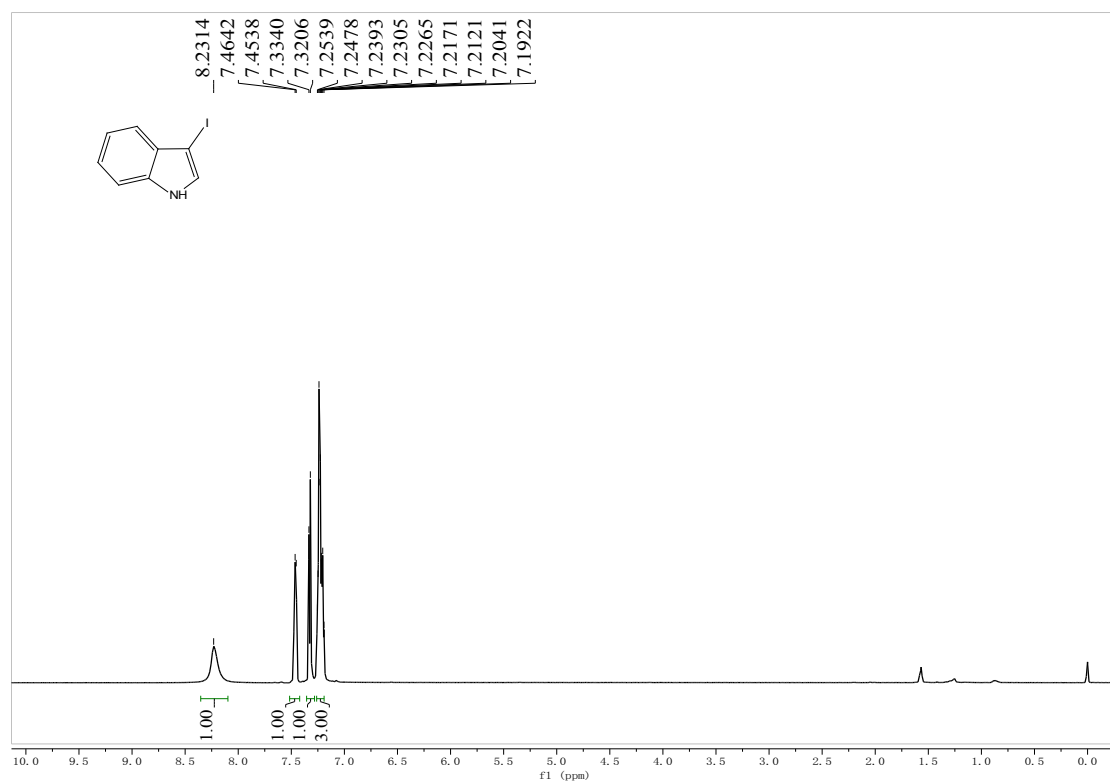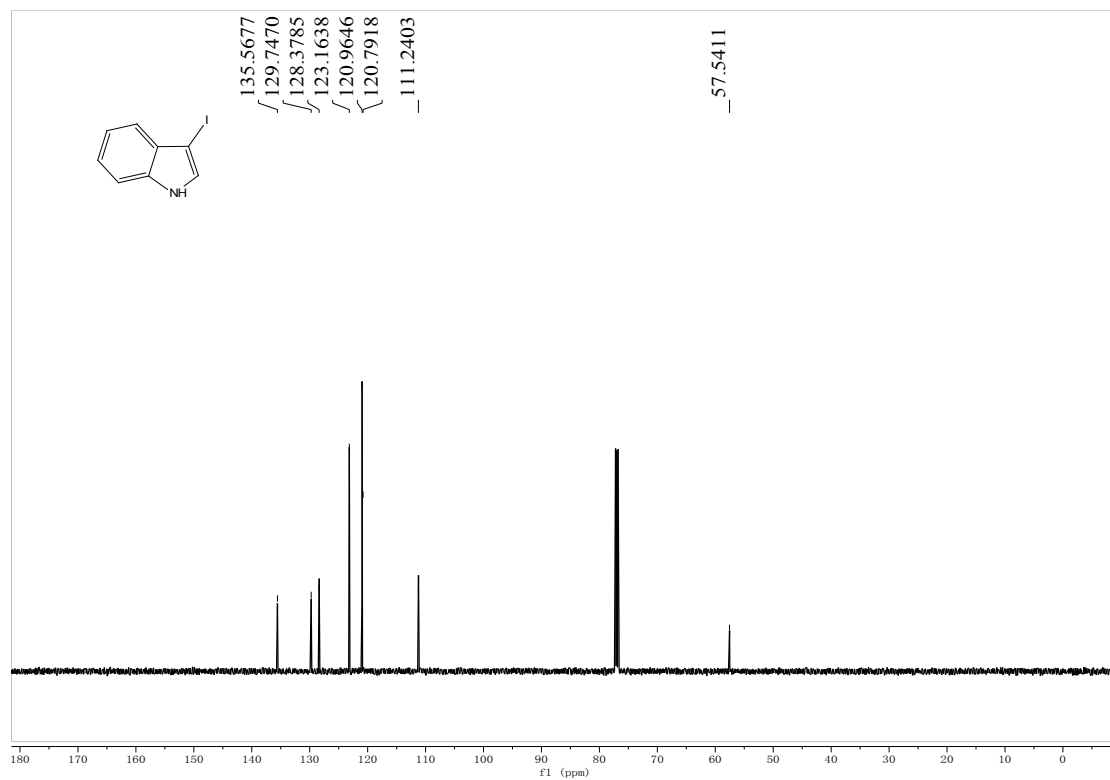



### Tetraisopropylthiuram Disulfide

This NMR spectra is used to identify the structure of compounds **12** and **28**. The  $^1\text{H}$  NMR signal peak of CH in isopropyl is weak and broad, and there are no  $^{13}\text{C}$  NMR signal peaks of the carbonyl and the CH.

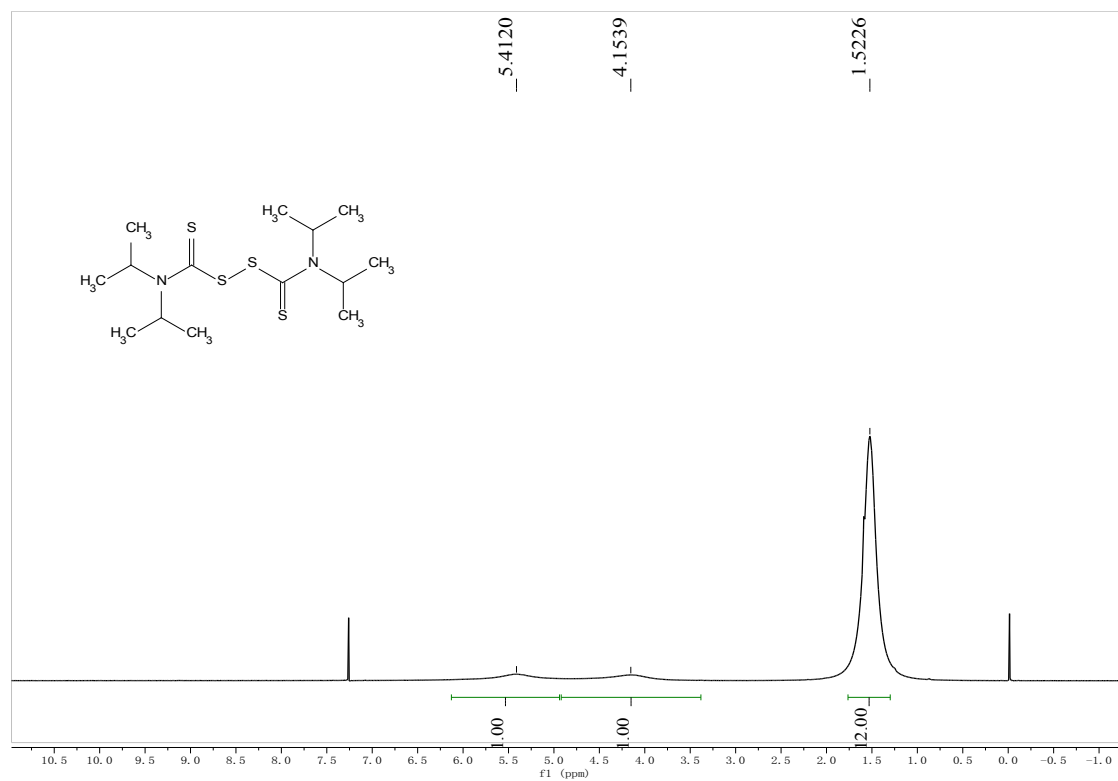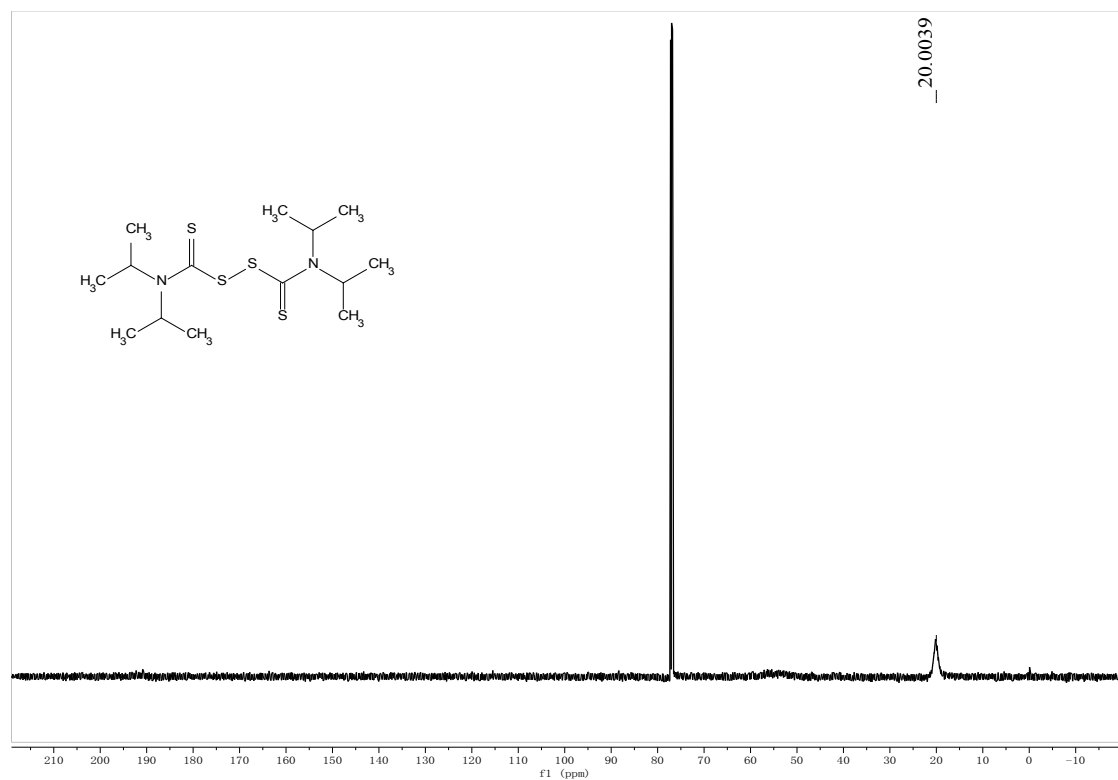

Supplement: c9ob02514f1.pdf [file c9ob02514f1.pdf]
